# Supplementary material
Source: ML conference proceedings conference paper supplement (https://openreview.net/forum?id=EoebmBe9fG)
Supplement: supplementary_material [file Optimal Mistake Bounds for Transductive Online Learning - Supplementary Materials Only.pdf › Optimal Mistake Bounds for Transductive Online Learning - Supplementary Materials Only.pdf]

## Technical Appendices and Supplementary Material

### A Preliminaries

#### A.1 Basic Notation

**Notation A.1.**  $\mathbb{N} = \{1, 2, 3, \dots\}$ , i.e.,  $0 \notin \mathbb{N}$ .  $\log(\cdot)$  and  $\ln(\cdot)$  denote logarithm to base 2 and  $e$ , respectively.

**Notation A.2** (Sequences). Let  $\mathcal{X}$  be a set and  $n, k \in \mathbb{N}$ . For a sequence  $x = (x_1, \dots, x_n) \in \mathcal{X}^n$ , we write  $x_{\leq k}$  to denote the subsequence  $(x_1, \dots, x_k)$ . If  $k \leq 0$  then  $x_{\leq k}$  denotes the empty sequence, which is also denoted by  $\lambda = \mathcal{X}^0$ . We use the notation  $\mathcal{X}^{\leq n} = \cup_{i=0}^n \mathcal{X}^i$ .

#### A.2 Standard Online Learning

Let  $\mathcal{X}$  be a set, and let  $\mathcal{H} \subseteq \{0, 1\}^{\mathcal{X}}$  be a collection of functions called a *hypothesis class*. A *learner strategy* or simply *learner* for the standard online learning game (Game 1) is a function

$$L : \bigcup_{i=0}^{n-1} (\mathcal{X} \times \{0, 1\})^i \times \mathcal{X} \rightarrow \{0, 1\},$$

where  $n \in \mathbb{N}$  is the number of rounds in the game. The set of all such learner strategies is denoted  $\mathcal{L}_n$ . An *adversary strategy* or simply *adversary* for the standard online learning game is a pair of functions

$$A_{\text{instance}} : \bigcup_{i=0}^{n-1} (\mathcal{X} \times \{0, 1\} \times \{0, 1\})^i \rightarrow \mathcal{X}, \text{ and}$$

$$A_{\text{label}} : \bigcup_{i=1}^{n-1} (\mathcal{X} \times \{0, 1\} \times \{0, 1\})^i \times \{0, 1\} \rightarrow \{0, 1\}.$$

The set of all such adversary strategies is denoted  $\mathcal{A}_n$ .

Semantically, the interpretation of these strategies is that in each round  $t \in [n]$  of Game 1, the adversary selects an instance

$$x_t = A_{\text{instance}}(x_1, \hat{y}_1, y_1, \dots, x_{t-1}, \hat{y}_{t-1}, y_{t-1}) \in \mathcal{X},$$

then the learner makes a prediction

$$\hat{y}_t = L(x_1, y_1, \dots, x_{t-1}, y_{t-1}, x_t) \in \{0, 1\},$$

and finally, the adversary assigns a label

$$y_t = A_{\text{label}}(x_1, \hat{y}_1, y_1, \dots, x_{t-1}, \hat{y}_{t-1}, y_{t-1}, \hat{y}_t) \in \{0, 1\}.$$

The adversary's function  $A_{\text{label}}$  must satisfy *realizability*, meaning that there exists  $h \in \mathcal{H}$  such that

$$\forall t \in [n] : y_t = h(x_t).$$

The number of mistakes is in a game with  $n$  rounds and hypothesis class  $\mathcal{H}$  between learner  $L$  and adversary  $A$  is

$$M_{\text{std}}(\mathcal{H}, n, L, A) = |\{t \in [n] : \hat{y}_t \neq y_t\}|.$$

#### A.3 Transductive Online Learning

Given  $\mathcal{X}$  and  $\mathcal{H}$  as in Appendix A.2, a learner strategy for the *transductive online learning setting* (Game 2) is a function

$$L : \mathcal{X}^n \times \bigcup_{i=0}^{n-1} \{0, 1\}^i \rightarrow \{0, 1\},$$

where  $n \in \mathbb{N}$  is the number of rounds in the game. An adversary strategy consists of a sequence  $x \in \mathcal{X}^n$  and an *adversary labeling strategy*, which is a function

$$A : \left( \bigcup_{i=0}^{n-1} \{0, 1\}^{2i} \right) \times \{0, 1\} \rightarrow \{0, 1\}.$$

436 The sets of all such learner and adversary strategies are denoted  $\mathcal{L}_n$  and  $\mathcal{A}_n$  respectively.  
 437 Semantically, the interpretation of these strategies is that at the start of Game 2, the adversary selects  
 438 the sequence  $x$ . Then, in each round  $t \in [n]$ , the learner makes a prediction

$$\hat{y}_t = L(x, y_1, \dots, y_{t-1}) \in \{0, 1\},$$

439 and then the adversary assigns a label

$$y_t = A(\hat{y}_1, y_1, \dots, \hat{y}_{t-1}, y_{t-1}, \hat{y}_t) \in \{0, 1\}.$$

440 Exactly as in Appendix A.2, the adversary's function  $A$  must satisfy realizability, namely,

$$\exists h \in \mathcal{H} \forall t \in [n] : y_t = h(x_t),$$

441 and the number of mistakes is in a game with sequence length  $n$  and hypothesis class  $\mathcal{H}$  between  
 442 learner  $L$  and adversary  $A$  is

$$M_{\text{tr}}(\mathcal{H}, n, L, A) = |\{t \in [n] : \hat{y}_t \neq y_t\}|.$$

#### 443 A.4 Mistake Bounds

444 In this paper, we study *optimal mistake bounds*, or the *optimal number of mistakes*, which is the value  
 445 of Games 1 and 2. For  $M \in \{M_{\text{std}}, M_{\text{tr}}\}$ , the optimal number of mistakes in a game with hypothesis  
 446 class  $\mathcal{H}$  and sequence length  $n$  is,

$$M(\mathcal{H}, n) = \sup_{A \in \mathcal{A}_n} \inf_{L \in \mathcal{L}_n} M(\mathcal{H}, n, L, A).$$

447 The optimal number of mistakes for hypothesis class  $\mathcal{H}$  is

$$M(\mathcal{H}) = \sup_{n \in \mathbb{N}} M(\mathcal{H}, n).$$

448 **Remark A.3.** As is common in learning theory literature, in both Game 1 and Game 2, we take  
 449 the sets  $\mathcal{L}_n$  and  $\mathcal{A}_n$  to be the sets of all (deterministic) functions. In this paper, we do not consider  
 450 randomized strategies. By allowing arbitrary functions, we ignore issues relating to computability.

#### 451 A.5 Trees

452 **Definition A.4** (Notation for binary trees). *Let  $d \in \mathbb{N} \cup \{0\}$ . A perfect binary tree of depth  $d$  is a*  
 453 *collection of  $2^{d+1} - 1$  nodes, which we identify with the collection of binary strings*

$$T_d = \{ \{0, 1\}^k : k \in \{0, 1, 2, \dots, d\} \}.$$

454 *The empty string, denoted  $\lambda = \{0, 1\}^0$ , is a member of  $T_d$  and is called the root of the tree. Every*  
 455 *string  $u \in \{0, 1\}^d$  is called a leaf. The depth of a node  $u \in T_d$ , denoted  $|u|$ , is the length of  $u$  as a*  
 456 *string, namely, the integer  $k$  such that  $u \in \{0, 1\}^k$ .*

457 *For two nodes  $u, v \in T_d$ , we say that  $u$  is a parent of  $v$ , and that  $v$  is a child of  $u$ , if  $v = u \circ 0$  or*  
 458  *$v = u \circ 1$ , where  $\circ$  denotes string concatenation. More fully, for  $b \in \{0, 1\}$ , we say that  $v$  is a  $b$ -child*  
 459 *of  $u$  if  $v = u \circ b$ .*

460 *Recursively, we define that  $u$  is an ancestor of  $v$  and that  $v$  is a descendant of  $u$ , and write  $u \preceq v$ , if*  
 461 *one of the following holds:*

$$462 \quad \bullet \quad v = u \text{ function } \in T_d : u \preceq w \preceq v.$$

463 *For  $b \in \{0, 1\}$ , we say that  $v$  is a  $b$ -descendant of  $u$ , denoted  $u \preceq_b v$ , if  $v$  is a descendant of the*  
 464  *$b$ -child of  $u$ .*

465 **Definition A.5** (Paths in a binary tree). *Let  $d, k \in \mathbb{N}$ ,  $k \leq d$ . Let  $u \in \{0, 1\}^k$  be a node in  $T_d$ .*  
 466 *The path to  $u$  is the unique sequence  $\text{path}(u) = (u_0, u_1, u_2, \dots, u_k)$  such that  $u_0 = \lambda$  is the root,*  
 467  *$u_k = u$ , and  $u_i$  is a child of  $u_{i-1}$  for all  $i \in [k]$ .*

468 *Let  $f : T_d \rightarrow \{0, 1\}$  be a function. The path of  $f$  is the unique sequence  $\text{path}(f) =$   
 469  *$(u_0, u_1, u_2, \dots, u_d)$  such that  $u_0 = \lambda$  is the root, and for each  $i \in [d]$ ,  $u_i = u_{i-1} \circ f(u_{i-1})$ .*  
 470 *Namely,  $u_i$  is the  $f(u_{i-1})$ -child of  $u_{i-1}$ .**

471 *For a hypothesis class  $\mathcal{H} \subseteq \{0, 1\}^{T_d}$ , we define  $\text{path}(\mathcal{H}) = \text{path}(f_{\text{maj}})$ , where  $f_{\text{maj}} : T_d \rightarrow \{0, 1\}$*   
 472 *is given by*

$$f_{\text{maj}}(u) = \mathbb{1} \left( \frac{|\{h \in \mathcal{H} : h(u) = 1\}|}{|\mathcal{H}|} \geq \frac{1}{2} \right).$$

## 473 A.6 Littlestone Dimension

474 **Definition A.6** (Littlestone, 1987). Let  $\mathcal{X}$  be a set, let  $\mathcal{H} \subseteq \{0, 1\}^{\mathcal{X}}$ , and let  $d \in \mathbb{N} \cup \{0\}$ . We say  
 475 that  $\mathcal{H}$  shatters the binary tree  $T_d$  if there exists a mapping  $T_d \rightarrow \mathcal{X}$  given by  $u \mapsto x_u$  such that for  
 476 every  $u \in \{0, 1\}^{d+1}$  there exists  $h_u \in \mathcal{H}$  such that

$$\forall i \in [d + 1] : h(x_{u_{\leq i-1}}) = u_i.$$

477 The Littlestone dimension of  $\mathcal{H}$ , denoted  $\text{LD}(\mathcal{H})$ , is the supremum over all  $d \in \mathbb{N}$  such that there  
 478 exists a Littlestone tree of depth  $d - 1$  that is shattered by  $\mathcal{H}$ .

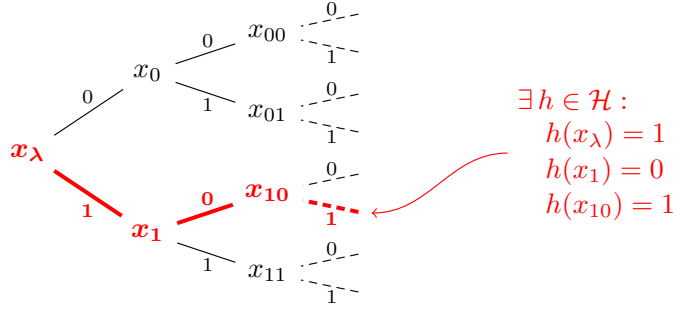

Figure 2: A shattered Littlestone tree of depth 2. The empty sequence is denoted by  $\lambda$ .

(Source: Bousquet et al., 2021)

479 **Theorem A.7** (Littlestone, 1987). Let  $\mathcal{X}$  be a set and let  $\mathcal{H} \subseteq \{0, 1\}^{\mathcal{X}}$  such that  $d = \text{LD}(\mathcal{H}) < \infty$ .  
 480 Then there exists a strategy for the learner that guarantees that the learner will make at most  $d$   
 481 mistakes in the standard (non-transductive) online learning setting, regardless of the adversary's  
 482 strategy and of the number  $n$  of instances to be labeled. Furthermore, there exists an adversary that  
 483 forces every learner to make at least  $\min\{n, d\}$  mistakes.

## 484 B Lower Bound

### 485 B.1 Statement

486 Our  $\Omega(\sqrt{d})$  lower bound states the following.

487 **Theorem B.1** (Lower bound). There exists a constant  $d_0 \geq 0$  as follows. Let  $d \in \mathbb{N}$ ,  $d \geq d_0$ , let  $\mathcal{X}$   
 488 be a set, and let  $\mathcal{H} \subseteq \{0, 1\}^{\mathcal{X}}$  be a hypothesis class with  $\text{LD}(\mathcal{H}) = d$ . Then for every  $k \in [d]$  there  
 489 exist a sequence  $x \in \mathcal{X}^n$  of length  $n = O(k \cdot 2^{\sqrt{k}})$  such that for every learning rule  $L$  there exists  
 490  $h \in \mathcal{H}$  such that

$$M_{\text{tr}}(L, x, h) \geq \sqrt{k}. \quad (3)$$

491 Moreover, this is witnessed by a simple adaptive labeling strategy for the adversary (as in Algorithm 1)  
 492 that forces every learning rule to make at least  $\sqrt{k}$  mistakes on the (same) sequence  $x$ . Furthermore,  
 493 for any integer  $n \in \mathbb{N}$ ,

$$M_{\text{tr}}(\mathcal{H}, n) \geq \min \left\{ \sqrt{d}, \lfloor \log(n) \rfloor \right\}. \quad (4)$$

494 See Section 2.2 for a general overview of this result and the main proof ideas. In the following  
 495 subsections we prove Theorem B.1. Algorithm 1 gives an explicit construction of the adversary that  
 496 witnesses the lower bound, using Algorithm 2 as a subroutine. We start with presenting some initial  
 497 observations about the behavior of these algorithms in Appendix B.2.

**Assumptions:**

- $d \in \mathbb{N}, \varepsilon = 2^{-\sqrt{d}/2}$ .
- $T = T_d$  is a perfect binary tree of depth  $d$ .
- $\mathcal{H} \subseteq \{0, 1\}^T$  is a class that shatters  $T$ .

**TRANSDUCTIVEADVERSARY ( $\mathcal{H}$ ):**

```

( $x_1, x_2, \dots, x_n$ )  $\leftarrow$  CONSTRUCTSEQUENCE ( $\mathcal{H}$ ) ▷ See Algorithm 2.
send ( $x_1, x_2, \dots, x_n$ ) to learner
 $\mathcal{H}_0 \leftarrow \mathcal{H}$ 
for  $t \in [n]$ :
    receive  $\hat{y}_t$  from learner
     $r_t \leftarrow \frac{|\{h \in \mathcal{H}_{t-1} : h(x_t) = 1\}|}{|\mathcal{H}_{t-1}|}$ 
     $y_{\text{maj}} \leftarrow \mathbb{1}(r_t \geq 1/2)$ 
     $y_t \leftarrow \begin{cases} y_{\text{maj}} & r_t \notin [\varepsilon, 1 - \varepsilon] \\ 1 - \hat{y}_t & \text{otherwise} \end{cases}$ 
    send  $y_t$  to learner
     $\mathcal{H}_t \leftarrow \{h \in \mathcal{H}_{t-1} : h(x_t) = y_t\}$ 

```

Algorithm 1: The strategy for the adversary that achieves the lower bound in Theorem B.1. Note that while the construction of the sequence  $x$  is not entirely trivial, the adversary's strategy for labeling this sequence is very simple.

498 **B.2 Analysis of the Adversary**

499 **Claim B.2.** Let  $d \in \mathbb{N}$ , let  $M = \sqrt{d}/10$ , and let  $\mathcal{H} \subseteq \{0, 1\}^{T_d}$  be a hypothesis class. Consider an  
500 execution of CONSTRUCTSEQUENCE ( $\mathcal{H}$ ) as in Algorithm 2 that produces a sequence  $x_1, x_2, \dots, x_t$ .  
501 Then:

- 502 (a) For all  $i \in [t]$ ,  $\text{path}(x_i)$  is a subsequence of  $x_0, x_1, \dots, x_i$ .
- 503 (b) The length  $t$  of the sequence satisfies  $t < n_d$ , where  $n_d = (d + 1) \cdot 2^{M+1}$ .

504 *Proof.*

- 505 (a) Fix  $i \in [t]$ . It suffices to show that for all  $u \in T_d$ , if  $u \preceq x_i$  then  $u \in (x_1, x_2, \dots, x_i)$ .  
506 Proceed by induction on  $i$ . For the base case  $i = 1$ , the claim holds because  $x_1 = \lambda$ .

507 For the induction step, assume the claim holds for  $i \in [t - 1]$ . Let  $u \preceq x_{i+1}$ , we prove that  
508  $u \in (x_1, x_2, \dots, x_{i+1})$ . Assume  $x_{i+1} \neq \lambda$  (otherwise, there is nothing to prove).

509 Because  $x_{i+1}$  appears in the sequence  $x$ , it must have been added to  $\mathcal{Q}$  before it was added to  
510  $x$ . The only place where items that are not  $\lambda$  are added to  $\mathcal{Q}$  is in the line  $\mathcal{Q} \leftarrow \mathcal{Q} \cup \{x_t \circ y\}$ .  
511 Namely, there exist an index  $j \in [i]$  and a bit  $y \in \{0, 1\}$  such that  $x_{i+1} = x_j \circ y$  (note  
512 that  $j < i + 1$  because  $x_j$  was added to the sequence before  $x_{i+1}$ ). If  $x_j = u$  we are  
513 done. Otherwise, note that  $x_j$  is the parent of  $x_{i+1}$ , and therefore  $u \preceq x_j$ . By the induction  
514 hypothesis,  $u \in (x_1, x_2, \dots, x_j)$ . This concludes the proof.

- 515 (b) Items are added to the the sequence  $x$  only if they were previously added to  $\mathcal{Q}$ . Therefore,  
516 the length of the sequence  $x$  is  $t = U + 1$ , where  $U$  is the number of times that the line  
517 “ $\mathcal{Q} \leftarrow \mathcal{Q} \cup \{x_t \circ y\}$ ” was executed (we add 1 because  $\lambda$  is added to  $\mathcal{Q}$  elsewhere).

518 Consider a function  $f$  that maps a node  $u$  in the sequence  $x$  to the value of the index  $b'$  at  
 519 the time that  $u$  was added to  $\mathcal{Q}$ . Namely, if  $u = x_t \circ y$  and the index  $b'$  had some value  $\beta$   
 520 when the line “ $\mathcal{Q} \leftarrow \mathcal{Q} \cup \{x_t \circ y\}$ ” was executed, then  $f(u) = \beta$ .

521 Notice that “ $\mathcal{Q} \leftarrow \mathcal{Q} \cup \{x_t \circ y\}$ ” is executed only if the condition  $x_t \in \text{path}(\mathcal{H}_{b'})$  is satisfied  
 522 in the previous line. By Item (a), the line “ $\mathcal{H}_{b'} \leftarrow \{h \in \mathcal{H}_b : h(x_t) = y\}$ ”, and the fact that  
 523 items in  $\mathcal{Q}$  are processed in lexicographic order, it follows that there exists some assignment  
 524 of labels  $\ell : \text{path}(x_t) \rightarrow \{0, 1\}$  such that

$$\mathcal{H}_{b'} \subseteq \{h \in \mathcal{H} : (\forall u \in \text{path}(x_t) : h(u) = \ell(u))\}.$$

#### Assumptions:

- $d \in \mathbb{N}$ ,  $M = \sqrt{d}/10$ ,  $\varepsilon = 2^{-\sqrt{d}/2}$ .
- $T = T_d$  is a perfect binary tree of depth  $d$ .
- $\lambda$ , the empty string, is the root of  $T$ .
- $\mathcal{H} \subseteq \{0, 1\}^T$  is a class that shatters  $T$ .

#### CONSTRUCTSEQUENCE( $\mathcal{H}$ ):

```

 $\mathcal{H}_\lambda \leftarrow \mathcal{H}$ 
 $\mathbb{H}_0 \leftarrow \{\mathcal{H}_\lambda\}$  ▷ A set of classes indexed by bit strings.
 $\mathcal{Q} \leftarrow \{\lambda\}$  ▷ A set of nodes to be processed.
 $t \leftarrow 0$ 
while  $|\mathcal{Q}| > 0$ :
   $t \leftarrow t + 1$ 
   $x_t \leftarrow \min_{\leq_{\text{lex}}} \mathcal{Q}$  ▷ Pop the lexicographically first string from  $\mathcal{Q}$  and add
   $\mathcal{Q} \leftarrow \mathcal{Q} \setminus \{x_t\}$  it to the output sequence.
   $\mathbb{H}_t \leftarrow \emptyset$ 
  for  $\mathcal{H}_b \in \mathbb{H}_{t-1}$ :
     $r \leftarrow \frac{|\{h \in \mathcal{H}_b : h(x_t) = 1\}|}{|\mathcal{H}_b|}$ 
     $\mathcal{Y} \leftarrow \begin{cases} \{0, 1\} & (r \in [\varepsilon, 1 - \varepsilon]) \wedge (|b| \leq M) \\ \{\mathbb{1}(r \geq 1/2)\} & \text{otherwise} \end{cases}$  ▷
    Adversary will force
    mistakes on the first
     $M$  balanced nodes.
    for  $y \in \mathcal{Y}$ :
       $b' \leftarrow \begin{cases} b & |\mathcal{Y}| = 1 \\ b \circ y & |\mathcal{Y}| = 2 \end{cases}$  ▷ Restrict class to agree with  $y$ . If split-
       $\mathcal{H}_{b'} \leftarrow \{h \in \mathcal{H}_b : h(x_t) = y\}$  ting the class in two to force a mis-
       $\mathbb{H}_t \leftarrow \mathbb{H}_t \cup \{\mathcal{H}_{b'}\}$  take then create new indices.
      if  $x_t \in \text{path}(\mathcal{H}_{b'}) \wedge |x_t| < d$ : ▷ If  $x_t$  is on-path for  $\mathcal{H}_{b'}$  and it has a
       $\mathcal{Q} \leftarrow \mathcal{Q} \cup \{x_t \circ y\}$   $y$ -child, add that child to  $\mathcal{Q}$ .

return  $(x_1, x_2, \dots, x_t)$ 

```

Algorithm 2: A subroutine of Algorithm 1 for selecting the sequence  $x$ .

Consequently,  $x_t \in \text{path}(\mathcal{G})$  for any class  $\mathcal{G}$  that is a restriction of  $\mathcal{H}_{b'}$ ; in particular, because the only way that  $\mathcal{H}_{b'}$  might be modified later during the execution of Algorithm 2 is by restricting it further, it follows that  $x_t \in \text{path}(\mathcal{H}_{b'})$  when the line “ $\mathcal{Q} \leftarrow \mathcal{Q} \cup \{x_t \circ y\}$ ” is executed and in all subsequent times.

However,  $|\text{path}(\mathcal{G})| = d + 1$  for any class  $\mathcal{G} \subseteq \{0, 1\}^{T_d}$ . This implies that  $f$  maps at most  $(d + 1)$  nodes to each bit string.<sup>19</sup> In other words, for any bit string  $b$ , the size of the preimage satisfies  $|f^{-1}(b)| \leq d + 1$ .

Thus,

$$\begin{aligned}
t &= 1 + |\{2, 3, \dots, t\}| \\
&= 1 + \sum_{\substack{b \in \{0, 1\}^k \\ k \leq M}} |\{i \in \{2, 3, \dots, t\} : f(x_i) = b\}| \\
&= 1 + \sum_{\substack{b \in \{0, 1\}^k \\ k \leq M}} |f^{-1}(b)| \\
&\leq 1 + \sum_{\substack{b \in \{0, 1\}^k \\ k \leq M}} (d + 1) \\
&\leq 1 + (d + 1) \cdot (2^{M+1} - 1). \\
&< (d + 1) \cdot 2^{M+1},
\end{aligned}$$

as desired. □

**Claim B.3.** Let  $d \in \mathbb{N}$ , and let  $\mathcal{H} \subseteq \{0, 1\}^{T_d}$  be a hypothesis class. Consider an execution of TRANSDUCTIVEADVERSARY( $\mathcal{H}$ ) as in Algorithm 1. Let

$$\mathcal{H}_0, \mathcal{H}_1, \dots, \mathcal{H}_n$$

be the sequence of hypothesis classes created by TRANSDUCTIVEADVERSARY, and let

$$\mathbb{H}_0, \mathbb{H}_1, \dots, \mathbb{H}_n$$

be the sequence of collections created by the subroutine CONSTRUCTSEQUENCE (Algorithm 2). Then

$$\forall t \in \{0, 1, \dots, n\} : \mathcal{H}_t \in \mathbb{H}_t.$$

*Proof.* Proceed by induction on  $t \in \{0, 1, \dots, n\}$ . The base case  $t = 0$  is satisfied, because  $\mathcal{H}_0 = \mathcal{H} \in \{\mathcal{H}\} = \mathbb{H}_0$ . For the induction step, assume that  $\mathcal{H}_{i-1} \in \mathbb{H}_{i-1}$  for some  $i \in [n]$ . We prove that  $\mathcal{H}_i \in \mathbb{H}_i$ .

Let  $y_i$  be the label assigned to  $x_i$  by TRANSDUCTIVEADVERSARY. Then

$$\mathcal{H}_i = \{h \in \mathcal{H}_{i-1} : h(x_i) = y_i\}.$$

Consider the iteration of the while loop in CONSTRUCTSEQUENCE that starts with  $t \leftarrow i$ . By the induction hypothesis,  $\mathcal{H}_{i-1} \in \mathbb{H}_{i-1}$ . Therefore, in this iteration of the while loop, there will be an iteration of the “for  $\mathcal{H}_b \in \mathbb{H}_{t-1}$ ” loop where  $\mathcal{H}_b = \mathcal{H}_{i-1}$ . In that iteration,  $y_i \in \mathcal{Y}$  by construction of  $y_i$  and  $\mathcal{Y}$ . Therefore, in the iteration of the “for  $y \in \mathcal{Y}$ ” loop in which  $y = y_i$ ,

$$\mathcal{H}_{b'} = \{h \in \mathcal{H}_b : h(x_i) = y\} = \{h \in \mathcal{H}_{i-1} : h(x_i) = y_i\} = \mathcal{H}_i.$$

The class  $\mathcal{H}_{b'}$  is then added to  $\mathbb{H}_i = \mathbb{H}_t$  in the line “ $\mathbb{H}_t \leftarrow \mathbb{H}_t \cup \{\mathcal{H}_{b'}\}$ ”. Furthermore, no class is ever removed from  $\mathbb{H}_t$ . So  $\mathcal{H}_i \in \mathbb{H}_i$ , as desired. □

<sup>19</sup>Note that  $x_t \circ y$  could be added to  $\mathcal{Q}$  twice: once with  $y = 0$  and a second time with  $y = 1$ . However, when this happens, the index  $b$  is replaced by two indices of the form  $b' = b \circ y$ ; for each such  $b'$ , there just is a single node of the form  $x_t \circ y$  such that  $f(x_t \circ y) = b'$ .

**Claim B.4.** Let  $d \in \mathbb{N}$ , let  $k \in \{0, 1, \dots, d\}$ , and let  $\mathcal{H} \subseteq \{0, 1\}^{T_d}$  be a hypothesis class. Consider an execution of `TRANSDUCTIVEADVERSARY` ( $\mathcal{H}$ ) as in Algorithm 1 where the adversary constructs a sequence of nodes  $x_1, x_2, \dots, x_n \in T_d$  and a sequence of classes  $\mathcal{H}_0, \mathcal{H}_1, \dots, \mathcal{H}_n \subseteq \{0, 1\}^{T_d}$ . Then there exists  $i \in [n]$  such that

1.  $|x_i| = k$ , and
2.  $x_i \in \text{path}(\mathcal{H}_{i-1})$ .

*Proof.* Proceed by induction on  $k$ . For the base case  $k = 0$ , notice that  $x_1 = \lambda$ ,  $|\lambda| = 0$ , and  $\lambda \in \text{path}(\mathcal{H}_0)$ .

For the induction step, assume the claim holds for some  $k \in \{0, 1, \dots, d-1\}$ , and let  $i_k \in [n]$  such that  $|x_{i_k}| = k$  and  $x_{i_k} \in \text{path}(\mathcal{H}_{i_k-1})$ ; we prove that the claim holds for  $k+1$  as well.

Consider the iteration of the while loop in `CONSTRUCTSEQUENCE` in which  $x_{i_k}$  is added to the sequence (i.e., the iteration starting with  $t \leftarrow i_k$ ). By Claim B.3,  $\mathcal{H}_{i_k-1} \in \mathbb{H}_{i_k-1}$ . Hence, within this iteration of the while loop, there is an iteration of the “for  $\mathcal{H}_b \in \mathbb{H}_{t-1}$ ” loop such that  $\mathcal{H}_b = \mathcal{H}_{i_k-1}$ . By construction, the set  $\mathcal{Y}$  always contains the label predicted by the adversary, so  $y_{i_k} \in \mathcal{Y}$ . Because  $x_{i_k} \in \text{path}(\mathcal{H}_{i_k-1}) = \text{path}(\mathcal{H}_b)$ , it follows that  $x_{i_k} \in \text{path}(\mathcal{H}_{b'})$ . Seeing as  $|x_{i_k}| < d$ , in the last line of the iteration of the “for  $y \in \mathcal{Y}$ ” loop with  $y = y_{i_k}$ , the node  $x_{i_{k+1}} := x_{i_k} \circ y_{i_k}$  is added to  $\mathcal{Q}$ . This guarantees that  $x_{i_{k+1}}$  will eventually be popped from  $\mathcal{Q}$  and added to the sequence returned by `CONSTRUCTSEQUENCE`. Once a node has been added to the sequence, it is never removed.

Notice that  $|x_{i_{k+1}}| = |x_{i_k}| + 1 = k+1$ , satisfying Item 1. Therefore, it remains to show Item 2, namely, to show that  $x_{i_{k+1}} \in \text{path}(\mathcal{H}_{i_{k+1}-1})$ .

Let  $(\lambda = u_0, u_1, u_2, \dots, u_k = x_{i_k}) = \text{path}(x_{i_k})$  be the root-to-node path to  $x_{i_k}$ . By Item (a) in Claim B.2,  $\text{path}(x_{i_k})$  is a subsequence of  $x_{\leq i_k}$ . By the construction of the version space  $\mathcal{H}_{i_k}$ ,  $\mathcal{H}_{i_k}$  is restricted to agree with the root-to-node path to  $x_{i_k}$ , as well as with the label  $y_{i_k}$ .<sup>20</sup> So  $\mathcal{H}_{i_k}$  is restricted to agree with the root-to-node path to  $x_{i_k} \circ y_{i_k} = x_{i_{k+1}}$ . This implies that,

$$\forall \mathcal{G} \subseteq \mathcal{H}_{i_k} : x_{i_{k+1}} \in \text{path}(\mathcal{G}).$$

In particular, because  $\mathcal{H}_{i_{k+1}-1} \subseteq \mathcal{H}_{i_k}$ , it follows that  $x_{i_{k+1}} \in \text{path}(\mathcal{H}_{i_{k+1}-1})$ , as desired.  $\square$

### B.3 Proof

**Claim B.5.** Let  $d \in \mathbb{N}$ ,  $d \geq 800$ , and let  $\mathcal{H} \subseteq \{0, 1\}^{T_d}$  with cardinality  $|\mathcal{H}| = 2^{d+1}$  be a hypothesis class that shatters  $T_d$ . Consider an execution of `TRANSDUCTIVEADVERSARY` ( $\mathcal{H}$ ) as in Algorithm 1. Let  $x_1, \dots, x_n$  and  $y_1, \dots, y_n$  be nodes and labels selected by the adversary, let  $\mathcal{H}_0, \mathcal{H}_1, \dots, \mathcal{H}_n$  be the hypothesis classes defined by the adversary, and let  $\hat{y}_1, \dots, \hat{y}_n$  be the labels selected by the learner.

Let

$$S = \{s_0, s_1, s_2, \dots\} = \{t \in [n] : r_t \in [\varepsilon, 1 - \varepsilon]\}$$

be the set of indices where the adversary forces a mistake.

For each  $k \in \{0, 1, 2, \dots, \lfloor \sqrt{d} \rfloor\}$ , define

$$s_{\max}(k) = \max \left\{ t \in [n] : |x_t| \leq k\sqrt{d} \right\}.$$

Then  $|S| \geq \lfloor \sqrt{d} \rfloor + 1$ , and for all  $k \in \{0, 1, 2, \dots, \lfloor \sqrt{d} \rfloor\}$ :

1.  $s_k \leq s_{\max}(k)$ , and
2.  $|\mathcal{H}_{s_k}| \geq 2^{d-k\sqrt{d}}$ .

<sup>20</sup>Formally, there exists a mapping  $j : \text{path}(x_{i_k}) \rightarrow [i_k]$  such that for each  $u \in \text{path}(x_{i_k})$ ,  $u = x_{j(u)}$ , and  $\mathcal{H}_{i_k} \subseteq \{h \in \mathcal{H} : (\forall u \in \text{path}(x_{i_k}) : h(u) = y_{j(u)})\}$ .

586 *Proof.* Proceed by induction on  $k$ . For the base case  $k = 0$ ,  $s_{\max}(0) = 1$  because  $x_1 = \lambda$  is the  
 587 root, and all other nodes in the sequence are strictly deeper than the root. Because  $\mathcal{H}$  shatters  $T_d$  and  
 588  $|\mathcal{H}| = 2^{d+1}$ ,  $\mathcal{H}$  is perfectly balanced on the root  $\lambda$ , meaning that for all  $v \in \{0, 1\}$ , if we denote

$$\mathcal{H}_{(v)} = \{h \in \mathcal{H} : h(\lambda) = v\},$$

589 then

$$|\mathcal{H}_{(v)}| = \frac{1}{2} \cdot 2^{d+1} = 2^d. \quad (5)$$

590 So  $r_1 = 1/2$ , and therefore the adversary forces a mistake on index  $s_0 = s_{\max}(0) = 1$ , satisfying  
 591 Item 1. Furthermore, Eq. (5) implies,

$$|\mathcal{H}_{s_0}| = |\mathcal{H}_1| = |\mathcal{H}_{(y_1)}| = 2^d = 2^{d-k\sqrt{d}},$$

592 satisfying Item 2.

593 For the induction step, assume for some  $k \in \{0, 1, 2, \dots, \lfloor \sqrt{d} \rfloor - 1\}$  that  $|S| \geq k + 1$  and Items 1  
 594 and 2 hold for  $k$ . We show that  $|S| \geq k + 2$  and Items 1 and 2 hold for  $k + 1$  as well. To  
 595 establish  $|S| \geq k + 1$  and Item 1 for  $k + 1$ , it suffices to show that there exists an index  $t$  such that  
 596  $s_k < t \leq s_{\max}(k + 1)$  and  $r_t \in [\varepsilon, 1 - \varepsilon]$ . Assume for contradiction that no such index exists. Then,

$$\begin{aligned} |\mathcal{H}_{s_{\max}(k+1)}| &\geq |\mathcal{H}_{s_k}| \cdot \prod_{t=s_k+1}^{s_{\max}(k+1)} \max\{r_t, 1 - r_t\} && (r_t \notin [\varepsilon, 1 - \varepsilon] \text{ implies } y_t = y_{\text{maj}}, \\ &&& \text{so larger subclass survives}) \\ &\geq 2^{d-k\sqrt{d}} \cdot \prod_{t=s_k+1}^{s_{\max}(k+1)} \max\{r_t, 1 - r_t\} && (\text{Induction hypothesis Item 2}) \\ &\geq 2^{d-k\sqrt{d}} \cdot (1 - \varepsilon)^{n_d} && (r_t \notin [\varepsilon, 1 - \varepsilon]; \text{Item (b) in Claim B.2}) \\ &\geq 2^{d-k\sqrt{d}-1}, \end{aligned} \quad (6)$$

597 where the last inequality holds because

$$(1 - \varepsilon)^{n_d} = \left(1 - 2^{-\sqrt{d}/2}\right)^{(d+1) \cdot 2^{\sqrt{d}/10+1}} \geq \frac{1}{2} \quad (7)$$

598 for our choice of  $d \geq 800$ .

599 On the other hand, by Claim B.4, there exists  $t \in [s_{\max}(k + 1)]$  such that  $|x_t| = (k + 1)\sqrt{d}$  and  
 600  $x_t \in \text{path}(\mathcal{H}_{t-1})$ . By Item (a) in Claim B.2 and the construction of  $\mathcal{H}_t$ , the class  $\mathcal{H}_t$  agrees with the  
 601 root-to-node path to  $x_t$ . Namely, there exists an assignment of labels  $\ell : \text{path}(x_t) \rightarrow \{0, 1\}$  such  
 602 that

$$\mathcal{H}_t \subseteq \{h \in \mathcal{H} : (\forall u \in \text{path}(x_t) : h(u) = \ell(u))\}.$$

603 Seeing as  $|\text{path}(x_t)| = |x_t| + 1 = (k + 1)\sqrt{d} + 1$ , this implies that

$$|\mathcal{H}_{s_{\max}(k+1)}| \leq |\mathcal{H}_t| \leq 2^{d+1} 2^{-(k+1)\sqrt{d}-1} = 2^{d-(k+1)\sqrt{d}}. \quad (8)$$

604 Combining Eqs. (6) and (8) gives

$$2^{d-k\sqrt{d}-1} \leq |\mathcal{H}_{s_{\max}(k+1)}| \leq 2^{d-(k+1)\sqrt{d}}.$$

605 Namely,

$$d - k\sqrt{d} - 1 \leq d - (k + 1)\sqrt{d} \implies d \leq 1,$$

606 which is a contradiction to our choice of  $d \geq 800$ . This implies that  $|S| \geq k + 2$  and Item 1 holds for  
 607  $k + 1$ , namely, the index  $s_{k+1} \in S$  satisfies  $s_{k+1} \leq s_{\max}(k + 1)$ .

608 Item 2 follows by a calculation similar to Eq. (6). Seeing as  $s_{k+1}$  is the first index after  $s_k$  where a  
 609 mistake is forced,

$$\begin{aligned} |\mathcal{H}_{s_{k+1}}| &\geq \varepsilon \cdot (1 - \varepsilon)^{s_{k+1}-s_k} \cdot |\mathcal{H}_{s_k}| \\ &\geq \varepsilon \cdot (1 - \varepsilon)^{n_d} \cdot |\mathcal{H}_{s_k}| \end{aligned} \quad (\text{Item (b) in Claim B.2})$$



$$\begin{aligned}
&\geq \varepsilon \cdot (1 - \varepsilon)^{n_d} \cdot 2^{d-k\sqrt{d}} && \text{(Induction hypothesis Item 2)} \\
&\geq 2^{-\sqrt{d}/2} \cdot 2^{d-k\sqrt{d}-1} && \text{(Eq. (7) and choice of } \varepsilon \text{)} \\
&\geq 2^{d-(k+1)\sqrt{d}},
\end{aligned}$$

as desired.  $\square$

Finally, we complete the proof of the lower bound.

*Proof of Theorem B.1.* Fix  $d_0 = 800$  and assume  $d \geq d_0$ . Fix  $k \leq d$ . Seeing as  $\text{LD}(\mathcal{H}) = d$ ,  $\mathcal{H}$  shatters the tree  $T_k$ . By replacing  $\mathcal{H}$  with a suitable subset of  $\mathcal{H}$  as necessary, assume without loss of generality that  $\mathcal{H} \subseteq \{0, 1\}^{T_k}$  and  $|\mathcal{H}| = 2^{k+1}$ .

Consider an execution of  $\text{TRANSDUCTIVEADVERSARY}(\mathcal{H})$  as in Algorithm 1. By Item (b) in Claim B.2, Algorithm 1 constructs a sequence  $x = (x_1, x_2, \dots, x_n)$  of length  $n < n_k$  for

$$n_k = (d + 1) \cdot 2^{\sqrt{d}/10+1} = O(d \cdot 2^{\sqrt{d}}).$$

By Claim B.5, for every learning rule, the adversary forces at least  $\lfloor \sqrt{k} \rfloor + 1 \geq \sqrt{k}$  mistakes on the sequence  $x$ , establishing Eq. (3) in Theorem B.1 and the “moreover” sentence that follows it.

Fix a length  $n \in \mathbb{N}$ . Let  $k$  be the largest integer such that  $2^{\lceil \sqrt{k} \rceil} \leq n$  and  $k \leq d$ . By Eq. (3), there exists some sequence on which the adversary can force every learning rule to make at least  $\sqrt{k}$  mistakes. By Theorem C.2, this implies that there exists a sequence of length  $2^{\lceil \sqrt{k} \rceil} \leq n$  on which the adversary can force every learning rule to make at least  $\sqrt{k} = \min \{ \sqrt{d}, \lfloor \log(n) \rfloor \}$  mistakes. Namely,

$$M_{\text{tr}}(\mathcal{H}, n) \geq \min \{ \sqrt{d}, \lfloor \log(n) \rfloor \},$$

as in Eq. (4).  $\square$

## C Sequence Length

In this section, we show that if there exists a sequence on which the adversary can force  $M$  mistakes, then a sequence of length  $2^M - 1$  is sufficient, and this upper bound is tight for some classes.<sup>21</sup>

**Definition C.1** (Minimal sequence). *Let  $\mathcal{X}$  be a set, let  $\mathcal{H} \subseteq \{0, 1\}^{\mathcal{X}}$  be a class, and let  $M \in \mathbb{N}$ .*

*The minimal sequence length for forcing  $M$  mistakes for the class  $\mathcal{H}$ , denoted  $\text{MinLen}(\mathcal{H}, M)$  is*

$$\text{MinLen}(\mathcal{H}, M) = \inf \{ n \in \mathbb{N} : (\exists x \in \mathcal{X}^n : M_{\text{tr}}(\mathcal{H}, x) \geq M) \}.$$

*In words,  $\text{MinLen}(\mathcal{H}, M)$  is the smallest integer  $n$  for which there exists a sequence of length  $n$  on which the adversary can force at least  $n$  mistakes; if no such sequence exists, then  $\text{MinLen}(\mathcal{H}, M) = \infty$ .*

**Theorem C.2** (Minimal sequence bound). *Let  $\mathcal{X}$  be a set, and fix  $M \in \mathbb{N}$ . Then for any class  $\mathcal{H} \subseteq \{0, 1\}^{\mathcal{X}}$ , if  $\text{MinLen}(\mathcal{H}, M) < \infty$  then*

$$\text{MinLen}(\mathcal{H}, M) \leq 2^M - 1.$$

*Furthermore, there exists a class  $\mathcal{H} \subseteq \{0, 1\}^{\mathcal{X}}$  for which  $\text{MinLen}(\mathcal{H}, M) = 2^M - 1$ .*

Theorem C.2 is a corollary of the tree rank characterization of  $M_{\text{tr}}$  from Ben-David et al. (1997). For completeness, we present a direct proof of Theorem C.2 that does not directly invoke that characterization. Roughly, given an adversary  $A_0$  that forces every learner to make at least  $M$  mistakes on a (possibly long) sequence  $x$ , we apply two modifications to obtain new adversaries

$$A_0 \rightsquigarrow A_1 \rightsquigarrow A_2.$$

$A_1$  forces  $M$  mistakes and has a specific structure that we call ‘rigidity’, but it still uses the same (possibly long) sequence  $x$ . Capitalizing on the rigid structure,  $A_2$  selects a subsequence of  $x$  of length at most  $2^M - 1$ , and forces  $M$  mistakes on that subsequence.

<sup>21</sup>Of course, there also exist classes for which a shorter sequence is sufficient. For instance, if the class shatters (in the VC sense) a subset of the domain of cardinality  $M$ , then a sequence of length  $M$  suffices.

### 643 C.1 Rigid Adversary

644 **Definition C.3** (Rigid adversary). *Let  $n \in \mathbb{N}$ , let  $\mathcal{X}$  be a set, and let*

$$A : \left( \bigcup_{k=0}^{n-1} \{0, 1\}^{2k} \right) \times \{0, 1\} \rightarrow \{0, 1\}$$

645 *be an adversary strategy for some fixed sequence  $x \in \mathcal{X}^n$ . We say that  $A$  is rigid if there exists a*  
 646 *function*

$$f : \bigcup_{k=0}^{n-1} \{0, 1\}^k \rightarrow \{0, 1, \star\}$$

647 *such that for all  $k \in \{0, 1, \dots, n-1\}$  and all  $y, \hat{y} \in \{0, 1\}^k$ ,*

$$A(\hat{y}_1, y_1, \dots, \hat{y}_k, y_k, \hat{y}_{k+1}) = \begin{cases} f(y_1, \dots, y_k) & f(y_1, \dots, y_k) \in \{0, 1\} \\ 1 - \hat{y}_{k+1} & f(y_1, \dots, y_k) = \star \end{cases}.$$

648 Note that if an adversary is rigid, then the function  $f$  that witnesses this is uniquely determined.

649 **Claim C.4** (Rigid adversary exists). *Let  $n, M \in \mathbb{N}$ , let  $\mathcal{X}$  be a set, let  $x \in \mathcal{X}^n$ , and let  $\mathcal{H} \subseteq \{0, 1\}^{\mathcal{X}}$*   
 650 *be a class. Let  $A$  be an adversary strategy that forces every learner to make at least  $M$  mistakes on  $x$ .*  
 651 *Then there exists an adversary strategy  $A^*$  such that:*

- 652 1.  *$A^*$  forces every learner to make at least  $M$  mistakes on  $x$  and  $A^*$  is rigid.*
- 653 2. *Let  $f$  be the function that witnesses the rigidity of  $A^*$ . Then for every  $y \in \{0, 1\}^n$ , the*  
 654 *sequence*

$$f(y_{\leq 0}), f(y_{\leq 1}), f(y_{\leq 2}), \dots, f(y),$$

655 *has at least  $M$  members equal to  $\star$ .*

656 *Proof of Claim C.4.* For Item 1, consider the adversary strategy  $A^*$  that simulates an execution of  $A$ ,  
 657 as in Algorithm 3. In broad strokes,  $A^*$  functions as a middle-man between the learner and  $A$ . As  
 658 the learner makes a sequence of predictions  $\tilde{y} \in \{0, 1\}^n$ , the adversary  $A^*$  generates a sequence of  
 659 (possibly different) predictions  $\hat{y} \in \{0, 1\}^n$ , and sends those to the adversary  $A$ . Adversary  $A$  sees  
 660 only the predictions  $\hat{y}$ , and assigns labels  $y \in \{0, 1\}^n$ , which are relayed back to the learner by  $A^*$   
 661 with no modifications.

662 First, observe that  $A^*$  satisfies the realizability requirement. Indeed,  $A^*$  simulates an execution of  $A$   
 663 such that the sequence of labels  $y_1, \dots, y_n$  sent by  $A^*$  to the learner is exactly the sequence of labels  
 664 selected by  $A$ . Seeing as  $A$  is realizable, every sequence of labels selected by  $A$  is realizable, and  
 665 therefore every sequence of labels selected by  $A^*$  must be realizable as well.

666 Second, observe that  $A^*$  forces every learner to make at least  $M$  mistakes. To see this, notice that in  
 667 Algorithm 3,

$$\sum_{t \in [n]} \mathbb{1}(\tilde{y}_t \neq y_t) \geq M. \tag{9}$$

668 Indeed,  $A$  forces every learner to make at least  $M$  mistakes, and in particular this applies to a learner  
 669 that makes predictions  $\tilde{y}$  as in the simulation. Furthermore, observe that  $A^*$  only alters the predictions  
 670 it receives from the learner in cases when it selects a label that is accepted by  $A$ , namely,

$$\forall t \in [n] : \tilde{y}_t \neq \hat{y}_t \implies \tilde{y}_t = y_t. \tag{10}$$

671 Therefore, if  $E = \{t \in [n] : \tilde{y}_t = \hat{y}_t\}$ , then

$$\begin{aligned} \sum_{t \in [n]} \mathbb{1}(\tilde{y}_t \neq y_t) &= \sum_{t \in E} \mathbb{1}(\tilde{y}_t \neq y_t) + \sum_{t \in [n] \setminus E} \mathbb{1}(\tilde{y}_t \neq y_t) \\ &= \sum_{t \in E} \mathbb{1}(\tilde{y}_t \neq y_t) + 0 && \text{(By Eq. (10))} \\ &= \sum_{t \in E} \mathbb{1}(\hat{y}_t \neq y_t) && \text{(Definition of } E\text{)} \end{aligned}$$

**Assumptions:**

- $n \in \mathbb{N}$ ,  $\mathcal{X}$  is a set,  $x \in \mathcal{X}^n$  is a fixed sequence of instances.
- $A : \left( \bigcup_{k=0}^{n-1} \{0, 1\}^{2k} \right) \times \{0, 1\} \rightarrow \{0, 1\}$  is an adversary labeling strategy for  $x$ .

**RIGIDADVERSARY:**

```

send  $x_1, \dots, x_n$  to the learner
for  $t = 1, 2, \dots, n$ :
    receive prediction  $\hat{y}_t$  from learner
    if  $A(\tilde{y}_1, y_1, \dots, \tilde{y}_{t-1}, y_{t-1}, 0) = 0$ :
         $\tilde{y}_t \leftarrow 0$ 
    else if  $A(\tilde{y}_1, y_1, \dots, \tilde{y}_{t-1}, y_{t-1}, 1) = 1$ :
         $\tilde{y}_t \leftarrow 1$ 
    else:
         $\tilde{y}_t \leftarrow \hat{y}_t$ 
    send prediction  $\tilde{y}_t$  to  $A$ 
    receive label  $y_t$  from  $A$ 
    send label  $y_t$  to learner

```

Algorithm 3: Construction of a rigid adversary, by simulating a given adversary  $A$ .

$$\leq \sum_{t \in [n]} \mathbb{1}(\hat{y}_t \neq y_t). \quad (11)$$

672 Combining Eqs. (9) and (11) implies that  $A$  forces at least  $M$  mistakes.

673 Third, we show that  $A^*$  is rigid. We claim that there exists a function  $g : \{0, 1\}^{\leq n-1} \rightarrow \{0, 1\}^{\leq n-1}$   
 674 such that for every  $t \in \{0, 1, 2, \dots, n-1\}$ ,

$$(\tilde{y}_1, \dots, \tilde{y}_t) = g(y_1, \dots, y_t).$$

675 Proceed by induction on  $t$ . For the base case  $t = 0$  there is nothing to prove. For the induction step,  
 676 we assume the claim holds for some  $t = k < n - 1$ , and show that it holds for  $t = k + 1$ . From  
 677 Algorithm 3,  $\tilde{y}_{k+1}$  satisfies

$$\tilde{y}_{k+1} = \begin{cases} 0 & A(\tilde{y}_1, y_1, \dots, \tilde{y}_k, y_k, 0) = 0 \\ 1 & A(\tilde{y}_1, y_1, \dots, \tilde{y}_k, y_k, 0) = A(\tilde{y}_1, y_1, \dots, \tilde{y}_k, y_k, 1) = 1 \\ 1 - y_{k+1} & \text{otherwise} \end{cases} \quad (12)$$

678 The first two cases in Eq. (12) are immediate from Algorithm 3, and the remaining case occurs when  
 679  $A$  forces a mistake at time  $k + 1$ , namely, when  $A$  selects  $y_{k+1} = 1 - \tilde{y}_{k+1}$ . Thus,  $\tilde{y}_{k+1}$  is a function  
 680 of  $y_{\leq k+1}$  and  $\tilde{y}_{\leq k}$ . By the induction hypothesis,  $\tilde{y}_{\leq k} = g(y_{\leq k})$ , so  $\tilde{y}_{k+1}$  is simply a function of  
 681  $y_{\leq k+1}$ . This establishes the existence of the desired function  $g$ .

682 Hence,  $A^*$  is rigid, as witnessed by the function

$$f(y_1, \dots, y_k) = \begin{cases} 0 & A(\tilde{y}_1, y_1, \dots, \tilde{y}_k, y_k, 0) = 0 \\ 1 & A(\tilde{y}_1, y_1, \dots, \tilde{y}_k, y_k, 0) = A(\tilde{y}_1, y_1, \dots, \tilde{y}_k, y_k, 1) = 1 \\ \star & \text{otherwise} \end{cases},$$

683 where  $f$  is a well-defined function because  $\tilde{y}_{\leq k} = g(y_{\leq k})$ .

684 We have seen that  $A^*$  is a valid (realizable) adversary that forces every learner to make at least  $M$   
 685 mistakes, and it is rigid. This concludes the proof of Item 1.

686 Finally, For Item 2, note that  $\tilde{y}_t \neq y_t$  only if  $A$  forces a mistake at time  $t$  in the sense that  $A$  selects  
 687  $y_t = 1 - b$  for any prediction  $b \in \{0, 1\}$  provided at time  $t$ . If  $A$  forces a mistake at time  $t$ , then  $A^*$

688 forces a mistake at time  $t$  as well. Therefore, if  $\tilde{y}_t \neq y_t$ , then  $f(y_{<t}) = \star$ , namely,  $\tilde{y}_t$  makes mistakes  
 689 only when the value of  $f$  is  $\star$ . By Eq. (9),  $\tilde{y}_t$  makes at least  $M$  mistakes throughout the game, so  
 690 there must be at least  $M$  rounds where  $f$  outputs  $\star$ , as desired.  $\square$

## 691 C.2 Essential Indices

692 **Definition C.5.** Let  $n, M \in \mathbb{N}$ , let  $\mathcal{X}$  be a set, let  $x \in \mathcal{X}^n$ , and let  $\mathcal{H} \subseteq \{0, 1\}^{\mathcal{X}}$  be a class. Let  $A$   
 693 be a rigid adversary strategy witnessed by function  $f$ . We say that an index  $t \in [n]$  is essential for  
 694  $A$  for forcing  $M$  mistakes on  $x$  if there exists a sequence  $y \in \{0, 1\}^{t-1}$  such that  $f(y) = \star$  and the  
 695 sequence

$$f(y_{\leq 0}), f(y_{\leq 1}), f(y_{\leq 2}), \dots, f(y_{\leq t-1})$$

696 contains at most  $M - 1$  members equal to  $\star$ .

697 **Claim C.6.** Let  $n, M \in \mathbb{N}$ , let  $\mathcal{X}$  be a set, let  $x \in \mathcal{X}^n$ , and let  $\mathcal{H} \subseteq \{0, 1\}^{\mathcal{X}}$  be a class. Let  $A$  be  
 698 a rigid adversary strategy. Then  $[n]$  contains at most  $2^M - 1$  indices that are essential for  $A$  for  
 699 forcing  $M$  mistakes on  $x$ .

700 *Proof.* For each essential index  $t \in [n]$ , there exists a label sequence  $y \in \{0, 1\}^{t-1}$  that witnesses  
 701 that  $t$  is essential, as in Definition C.5. Each label sequence  $y$  is a witness for at most one index (the  
 702 index  $|y| + 1$ ), so it suffices to show that the set  $Y \subseteq \{0, 1\}^{\leq n-1}$  of all witness label sequences is of  
 703 cardinality at most  $2^M - 1$ .

704 Think of  $Y$  as a collection of nodes in the binary tree  $T_{n-1}$  (Definition A.4). By Definition C.5, if  
 705  $y \in Y$ , then the collection of all ancestors of  $y$  in  $Y$  has cardinality

$$|\{y_{\leq i} : i \in \{0, 1, 2, \dots, |y| - 1\}\} \cap Y| \leq M - 1.$$

706 Namely,  $Y$  is a subtree of depth at most  $d = M - 1$  in the binary tree  $T_{n-1}$ .<sup>22</sup> Hence, the number of  
 707 nodes in  $Y$  is at most

$$2^{d+1} - 1 = 2^M - 1,$$

708 as desired.  $\square$

---

<sup>22</sup>The depth of a subtree is  $s$  if the longest root-to-node path contains  $s + 1$  nodes from the subtree.

**Assumptions:**

- $n, M \in \mathbb{N}$ ,  $\mathcal{X}$  is a set,  $x \in \mathcal{X}^n$  is a fixed sequence of instances.
- $A_1 : \left( \bigcup_{k=0}^{n-1} \{0, 1\}^{2^k} \right) \times \{0, 1\} \rightarrow \{0, 1\}$  is a rigid adversary labeling strategy for  $x$  that forces every learner to make at least  $M$  mistakes on the sequence  $x$ , and satisfies Items 1 and 2 in Claim C.4.
- $I = \{i_1, i_2, \dots, i_k\} \subseteq [n]$  is the set of indices that are essential for  $A$  for forcing  $M$  mistakes on  $x$ , and  $i_1 \leq i_2 \leq \dots \leq i_k$ . By Claim C.6,  $k \leq 2^M - 1$ .

**MINIMALADVERSARY:**

```

send  $x_{i_1}, x_{i_2}, \dots, x_{i_k}$  to the learner
for  $t = 1, 2, \dots, n$ :
  if  $t \in I$ :
    receive prediction  $\hat{y}_t$  from learner
    send prediction  $\hat{y}_t$  to  $A_1$ 
    receive label  $y_t$  from  $A_1$ 
    send label  $y_t$  to learner
  else:
    send prediction  $\hat{y}_t = 0$  to  $A_1$ 
    receive label  $y_t$  from  $A_1$ 

```

Algorithm 4: Construction of an adversary that forces  $M$  mistakes using a sequence  $x$  of length at most  $2^M - 1$ . In the proof of Theorem C.2, this adversary is  $A_2$ . Internally, it simulates a rigid adversary  $A_1$ .

710 *Proof of Theorem C.2.* If  $\text{MinLen}(\mathcal{H}, M) < \infty$ , then there exist a sequence  $x \in \mathcal{X}^n$ , and an adver-  
 711 sary  $A_0$  that forces every learner to make at least  $M$  mistakes on  $x$ . By Claim C.4, there exists a rigid  
 712 adversary  $A_1$  that causes every learner to make at least  $M$  mistakes on  $x$ ,<sup>23</sup> and also satisfies Item 2  
 713 in Claim C.4. Let  $f$  be the function that witnesses the rigidity of  $A_1$ . By Claim C.6, the set  $I \subseteq [n]$   
 714 of indices that are essential for  $A_1$  for forcing  $M$  mistakes on  $x$  has cardinality  $k = |I| \leq 2^M - 1$ .

715 Algorithm 4 defines a new adversary,  $A_2$ , which forces every learner to make at least  $M$  mistakes on  
 716 a sequence of length  $k$ .  $A_2$  is realizable, because  $A_1$  is realizable.<sup>24</sup>

717 To see that adversary  $A_2$  forces every learner to make at least  $M$  mistakes, let  $y_1, \dots, y_n$  be the  
 718 sequence of labels assigned by  $A_2$ . Seeing as  $A_2$  assigns the same labels as  $A_1$ , and  $A_1$  satisfies  
 719 Item 2 in Claim C.4, it follows that there are at least  $M$  indices  $j \in [n]$  such that  $f(y_{\leq j-1}) = \star$ . Fix  
 720  $J \subseteq [n]$  to be the first  $M$  such indices. Then  $J \subseteq I$ , namely, all the indices in  $J$  are essential for  $A_1$   
 721 for forcing  $M$  mistakes on  $x$  (Definition C.5).

722 Therefore, for each  $j \in J$ ,  $A_2$  includes the instance  $x_j$  in the sequence of length  $k$  sent to the learner.  
 723 Then, in round  $j$  of the  $n$  rounds simulated by  $A_2$ :

- 724 • The learner makes a prediction  $\hat{y}_j \in \{0, 1\}$  corresponding to instance  $x_j$ .

<sup>23</sup>This is Item 1 in Claim C.4.

<sup>24</sup>The argument for realizability is the same as in the proof of Claim C.4.

725 • Adversary  $A_2$  sends prediction  $\hat{y}_j$  to adversary  $A_1$ . Because  $f(y_{\leq j-1}) = \star$ , adversary  $A_1$   
 726 assigns the label  $y_j = 1 - \hat{y}_j$ . Adversary  $A_2$  then sends that label  $y_j$  to the learner. So the  
 727 learner makes a mistake on  $x_j$ .

728 Hence, the learner makes at least  $|J| = M$  mistakes, as desired.  $\square$

## 729 D Upper Bound

### 730 D.1 Statement

731 The following result states that the lower bound of Theorem B.1 is tight for some classes.

732 **Theorem D.1** (Upper bound, and separation between standard and transductive online learning).  
 733 *For every integer  $d \geq 23$ , there exists a hypothesis class  $\mathcal{H} \subseteq \{0, 1\}^{\mathcal{X}}$  with a domain  $\mathcal{X}$  of size  
 734  $|\mathcal{X}| = 2^d - 1$  such that  $\text{LD}(\mathcal{H}) = d$  and the following two conditions hold for all  $n \in \mathbb{N}$ :*

- 735 1.  $M_{\text{tr}}(\mathcal{H}, n) \leq 48 \cdot \sqrt{d}$ .
- 736 2.  $M_{\text{std}}(\mathcal{H}, n) = \min\{n, d\}$ .

### 737 D.2 Hypothesis Class

738 In this section we construct the hypothesis class for Theorem D.1.

739 **Lemma D.2.** *Let  $d \in \mathbb{N}$ ,  $d \geq 22$ . Let  $T_d$  be a perfect binary tree of depth  $d$ , as in Definition A.4.  
 740 Then there exists a collection of functions  $\mathcal{H} \subseteq \{0, 1\}^{T_d}$  such that  $\text{LD}(\mathcal{H}) = d + 1$  and the following  
 741 two conditions hold for all  $H \subseteq \mathcal{H}$  and all  $X \subseteq T_d$ :*

- 742 1. *If  $\forall h \in H \forall x \in X : x \notin \text{path}(h) \wedge h(x) = 0$ , then  $\min\{|H|, |X|\} < 2^{2\sqrt{d}}$ .*
- 743 2. *If  $\forall h \in H \forall x \in X : x \notin \text{path}(h) \wedge h(x) = 1$ , then  $|H| < 2^{2\sqrt{d}}$  or  $|X| < 3\sqrt{d}$ .*

744 The proof employs the probabilistic method, showing that a hypothesis class sampled randomly from  
 745 a suitable distribution has the desired properties with very high probability.

746 *Proof.* Let  $\mathcal{P}$  be a probability distribution over hypothesis classes. Formally,  $\mathcal{P} \in$   
 747  $\Delta\left(\left(\{0, 1\}^{T_d}\right)^{2^{d+1}}\right)$  is a distribution over vectors of hypotheses. Each vector  $\mathcal{H} \in \text{supp}(\mathcal{P})$  consists  
 748 of  $2^{d+1}$  hypotheses,

$$\mathcal{H} = (h_b)_{b \in \{0, 1\}^{d+1}},$$

749 where for each  $b \in \{0, 1\}^{d+1}$ , hypothesis  $h_b$  is a function  $h_b : T_d \rightarrow \{0, 1\}$  sampled independently  
 750 as following:

- 751 • For each  $i \in [d] \cup \{0\}$ :  $h_b(b_{\leq i}) = b_{i+1}$ . (In particular, with probability 1,  $\text{path}(h_b) =$   
 752  $(b_{\leq 0}, b_{\leq 1}, \dots, b_{\leq d})$ , each entry in the vector  $\mathcal{H}$  is unique, and  $\mathcal{H}$  shatters  $T_d$ .)
- 753 • For each  $x \in T_d \setminus \text{path}(h_b)$ , the bit  $h_b(x) \in \{0, 1\}$  is sampled  $\text{Ber}(2^{-\sqrt{d}})$  independently of  
 754 all other bits in  $\mathcal{H}$ , i.e.,  $\mathbb{P}[h_b(x) = 1] = \mathbb{P}[h_b(x) = 1 \mid \{h_{b'}\}_{b' \neq b}, \{h_b(x')\}_{x' \neq x}] = 2^{-\sqrt{d}}$ .

755 Fix  $B \subseteq \{0, 1\}^{d+1}$  and  $X \subseteq T_d$ , and let  $E(B, X, y)$  denote the event

$$\{\forall b \in B \forall x \in X : x \notin \text{path}(h_b) \wedge h_b(x) = y\}. \quad (13)$$

756 Seeing as each off-path label  $h_b(x) \in \{0, 1\}$  is sampled independently,

$$\begin{aligned} \mathbb{P}_{\mathcal{H} \sim \mathcal{P}}[E(B, X, 0)] &= \prod_{(b, x) \in B \times X} \mathbb{P}_{\mathcal{H} \sim \mathcal{P}}[x \notin \text{path}(h_b) \wedge h_b(x) = 0] \\ &\leq (1 - 2^{-\sqrt{d}})^{|B \times X|}. \end{aligned} \quad (14)$$

757 Hence,

$$\begin{aligned}
& \mathbb{P}_{\mathcal{H} \sim \mathcal{P}} \left[ \exists B \subseteq \{0, 1\}^{d+1} \exists X \subseteq T_d : E(B, X, 0) \wedge \min \{|B|, |X|\} \geq 2^{2\sqrt{d}} \right] \\
& \leq \binom{|\{0, 1\}^{d+1}|}{\lceil 2^{2\sqrt{d}} \rceil} \binom{|T_d|}{\lceil 2^{2\sqrt{d}} \rceil} (1 - 2^{-\sqrt{d}})^{2^{4\sqrt{d}}} && \text{(union bound, Eq. (14))} \\
& < 2 \binom{2^{d+1}}{2^{2\sqrt{d}} + 1} (1 - 2^{-\sqrt{d}})^{2^{4\sqrt{d}}} \\
& < 2 \cdot 2^{(d+1) \cdot (2^{2\sqrt{d}} + 1)} \cdot e^{-2^{-\sqrt{d}} \cdot 2^{4\sqrt{d}}} && \left( \binom{n}{k} < n^k \text{ for } k \geq e; 1 + x \leq e^x \text{ for } x \in \mathbb{R} \right) \\
& < 2^{(d+2)2^{2\sqrt{d}}} \cdot 2^{-2^{-\sqrt{d}} \cdot 2^{4\sqrt{d}}} && (2^{2\sqrt{d}} \geq d + 2 \text{ for } d \geq 1) \\
& = 2^{2^{2\sqrt{d}} \cdot (d+2-2^{\sqrt{d}})} \\
& < 2^{-2^{2\sqrt{d}}} && (d + 2 - 2^{\sqrt{d}} < -1 \text{ for } d \geq 22) \\
& && (15)
\end{aligned}$$

758 Similarly,

$$\mathbb{P}_{\mathcal{H} \sim \mathcal{P}} [\forall b \in B \forall x \in X : x \notin \text{path}(h_b) \wedge h_b(x) = 1] \leq 2^{-\sqrt{d} \cdot |B \times X|}, \quad (16)$$

759 so

$$\begin{aligned}
& \mathbb{P}_{\mathcal{H} \sim \mathcal{P}} \left[ \exists B \subseteq \{0, 1\}^{d+1} \exists X \subseteq T_d : E(B, X, 0) \wedge |H| \geq 2^{2\sqrt{d}} \wedge |X| \geq 3\sqrt{d} \right] \\
& \leq \binom{|\{0, 1\}^{d+1}|}{\lceil 2^{2\sqrt{d}} \rceil} \binom{|T_d|}{\lceil 3\sqrt{d} \rceil} \cdot 2^{-\sqrt{d} \cdot 2^{2\sqrt{d}} \cdot 3\sqrt{d}} && \text{(union bound, Eq. (16))} \\
& < 2 \binom{2^{d+1}}{2^{2\sqrt{d}} + 1} \cdot 2^{-3d \cdot 2^{2\sqrt{d}}} \\
& < 2^{2d \cdot 2^{2\sqrt{d}}} \cdot 2^{-3d \cdot 2^{2\sqrt{d}}} && \text{(for } d \geq 2) \\
& < 2^{-d2^{2\sqrt{d}}}. && (17)
\end{aligned}$$

760 Applying a union bound to Eqs. (15) and (17) gives

$$\mathbb{P}_{\mathcal{H} \sim \mathcal{P}} [\mathcal{H} \text{ satisfies Items 1 and 2}] \geq 1 - 2^{-2^{2\sqrt{d}}} - 2^{-d2^{2\sqrt{d}}} \geq 1 - 10^{-100}.$$

761 In particular, there exists a collection  $\mathcal{H}$  that satisfies Items 1 and 2. Furthermore, this collection  
762 has  $\text{LD}(\mathcal{H}) = d + 1$  (namely,  $\text{LD}(\mathcal{H}) \geq d + 1$  because it shatters  $T_d$ ; and  $\text{LD}(\mathcal{H}) \leq d + 1$  because  
763  $|\mathcal{H}| = 2^{d+1}$ ).  $\square$

### 764 D.3 Algorithm

765 In this section we describe Algorithms 5, 6a and 6b, which together constitute the learning algorithm  
766 that achieves the  $O(\sqrt{d})$  mistake upper bound in the transductive setting, as in Theorem D.1. See  
767 Section 2.3 for a general overview of these algorithms.

#### 768 D.3.1 How Experts Work

769 We start with some preliminary remarks about experts in Algorithms 5, 6a and 6b.

770 **Experts.** A tuple  $e = (S, u, H)$  defines an expert that can make predictions using the procedure  
771 `EXPERT.PREDICT( $e, \cdot$ )`. The tuple  $e$  reflects two kinds of information:

- 772 1. *Knowledge.* Information that the expert *knows* with certainty. Specifically, this reflects the  
773 labels  $y_1, y_2, \dots$  sent by the adversary so far. All experts see the labels sent by the adversary,  
774 so this knowledge is the same for all experts.

2. *Assumptions.* At certain times, experts make *assumptions* about things that are not known for certain. Specifically, experts assume that certain nodes  $x$  are on-path ( $x \in \text{path}(h)$ ) or off-path ( $x \notin \text{path}(h)$ ) with respect to the correct labeling function  $h : T_d \rightarrow \{0, 1\}$ . Assumptions are simply guesses that may be wrong, and therefore when an expert needs to make such an assumption, it splits into two experts (as described below), with one expert assuming  $x \in \text{path}(h)$ , and the other expert assuming  $x \notin \text{path}(h)$ . This ensures that there always exists an expert for which all assumptions are correct.

In greater detail, the contents of the state tuple  $e = (S, u, H)$  represents the knowledge and assumptions of the expert as follows:

- $u \in T_d$  – This single node encodes everything the expert knows and assumes about which of the nodes labeled so far are on-path. Observe that if  $v_1, v_2, \dots, v_k \in T_d$  are nodes that are assumed to be on-path (and all these assumptions are consistent), then these  $k$  assumptions can be represented succinctly by assigning  $u = v_{i^*}$  where  $v_{i^*}$  is the deepest node among  $v_1, v_2, \dots, v_k$ . Therefore,  $u$  simply holds the deepest node in the tree that is known or assumed to be on-path. At the start of the algorithm, this value is initialized to be  $u = \lambda$ , because the root is known to be on-path regardless of the target function.
- $S \subseteq T_d$  – the ‘danger zone’, as described in Section 2.3.4. This is a collection that contains all nodes in the prefix  $x_{\leq t_{\max}} = (x_1, x_2, \dots, x_{t_{\max}})$  of the sequence to be classified that have not been labeled yet and *might* be on-path for the true labeling function  $h$  given what the expert knows and assumes so far. However,  $S$  is not required to contain ancestors of nodes that are assumed to be on-path. Initially,  $S$  equals the prefix  $x_{\leq t_{\max}}$ . As information accumulates, nodes that cannot be on-path are removed from  $S$ . For instance, if  $x_i \in T_d$  is assigned label  $y_i \in \{0, 1\}$  by the adversary, then any  $(1 - y_i)$ -descendant of  $x_i$  (including  $x_i$  itself) may safely be removed from  $S$ .
- $H \subseteq \{0, 1\}^{T_d}$  – the version space of the experts, i.e., the collection of all functions that could be the correct labeling function given everything that the expert knows and assumes. Initially,  $H$  contains all functions in  $\mathcal{H}$ . As information accumulates, some functions are ruled out. Specifically, a function  $h$  can be removed from  $H$  for two reasons: (i) the adversary assigns a label  $y \neq h(x)$  to some node  $x \in T_d$ ; (ii) the expert makes an assumption that some  $x \in T_d$  is on-path for the correct labeling function but  $x \notin \text{path}(h)$ , or vice versa, the expert assumes that  $x$  is off-path for the correct labeling function but  $x \in \text{path}(h)$ .

**Updates and splits.** An expert can be modified using the procedure  $\text{EXPERT.UPDATE}(e, \cdot, \cdot)$ . This procedure either returns a single modified tuple  $(S, u, H)$  (in the first two return statements in the procedure), in which case we think of the expert as being *updated*; or alternatively, the procedure returns two tuples  $e_{\in} = (S_{\in}, u_{\in}, H_{\in})$  and  $e_{\notin} = (S_{\notin}, u_{\notin}, H_{\notin})$  (in the third return statement), in which case we think of the expert as being *split* into two experts.  $e_{\in}$  corresponds to adding an assumption that the most recently presented node  $x_t$  is on-path for the correct labeling function, and  $e_{\notin}$  corresponds to adding the opposite assumption.

**Ancestry.** At the end of each iteration of the outer ‘for’ loop in Algorithm 5, for each expert  $e \in E_{t+1}$  there exists a unique *ancestry* sequence  $\text{ancestry}(e) = (e_1, e_2, \dots, e_{t+1})$  such that  $e_1 = (\{x_1, \dots, x_{t_{\max}}\}, \lambda, \mathcal{H})$  is the initial single expert that was created before the start of the outer ‘for’ loop,  $e_{t+1} = e$  is the latest version of the expert, and for each  $i \in [t]$ , the expert  $e_{i+1}$  is either equal to  $e_i$ , or it was created by executing  $\text{EXPERT.UPDATE}(e_i, \cdot, \cdot)$ .<sup>25</sup>

<sup>25</sup>Note that in this paper, we use genealogical metaphors in two distinct contexts that should not be confused. First, as is customary, we use “child”, “parent”, “ancestor” and “descendant” to describe relations between nodes in the binary tree  $T_d$ , which constitutes the domain of our hypothesis class. Separately from that, we use “ancestor” and “descendant” to describe relations between experts.

This overlap in terminology can partially be excused by the fact that the history of experts also forms a binary tree. Indeed, initially there is a single expert (the root of the tree), and experts can split into two, corresponding to a node having two children as in a binary tree. Seeing as experts cannot merge, the expert history corresponds precisely to a binary tree. (However, the domain  $T_d$  is a *perfect* binary tree, whereas the binary tree corresponding to expert genealogy need not be balanced).

To reduce confusion, we use  $\text{path}(\cdot)$  only for nodes in  $T_d$ , and  $\text{ancestry}(\cdot)$  only for experts, even though these operators are mathematically equivalent (however,  $\text{path}(\cdot)$  is defined not only for nodes in  $T_d$  but also for functions  $T_d \rightarrow \{0, 1\}$ ).



**Assumptions:**

- $d, n \in \mathbb{N}$ ,  $\lambda$  is the empty string.
- $\mathcal{H} \subseteq \{0, 1\}^{T_d}$  is the class that exists by Lemma D.2.
- $x_1, x_2, \dots, x_n \in T_d$  are points to be classified.

TRANSDUCTIVELERNER( $\mathcal{H}, d, (x_1, x_2, \dots, x_n)$ ):

$t \leftarrow 0, t_{\max} \leftarrow 2^{4\sqrt{d}}$   
 $e \leftarrow (\{x_1, \dots, x_{t_{\max}}\}, \lambda, \mathcal{H})$   $\triangleright$  The initial expert. An expert is defined by a 3-tuple.  
 $w(e) \leftarrow 1$   $\triangleright$  Assign the initial expert a weight of 1.  
 $E_1 \leftarrow \{e\}$   $\triangleright E_t$  is the set of experts used for predicting  $\hat{y}_t$ .  
 $E_2, \dots, E_n, E_{n+1} \leftarrow \emptyset$

**for**  $t \leftarrow 1, 2, \dots, n$ :

$\hat{y}_t \leftarrow \mathbb{1} \left( \sum_{e \in E_t} w(e) \cdot \text{EXPERT.PREDICT}(e, x_t) \geq \frac{1}{2} \right)$   $\triangleright$

A weighted majority, using  
Algorithm 6a.

**send** prediction  $\hat{y}_t$  to adversary

**receive** correct label  $y_t \in \{0, 1\}$  from adversary

**for**  $e \in E_t$ :  $\triangleright$  Update the experts.

**if**  $\text{EXPERT.PREDICT}(e, x_t) = y_t$ :

$E_{t+1} \leftarrow E_{t+1} \cup \{e\}$   $\triangleright$  If expert  $e$  made a correct prediction,  
 keep it and its weight unchanged.

**else**:

$U \leftarrow \text{EXPERT.UPDATE}(e, x_t, y_t)$   $\triangleright$  If  $e$  made a mistake, update  $e$  using  
 Algorithm 6b. This might cause  $e$  to  
 be split into two experts.

**for**  $e' \in U$ :

$E_{t+1} \leftarrow E_{t+1} \cup \{e'\}$   $\triangleright$  Add updated expert(s) to  $E_{t+1}$ .  
 $w(e') \leftarrow w(e)/(2 \cdot |U|)$   $\triangleright$  When  $e$  makes a mistake, its weight  
 is decreased by a factor of 2 and then  
 split equally between its descendants.

Algorithm 5: A transductive online learning algorithm that makes at most  $O(\sqrt{d})$  mistakes. It is a variant of the multiplicative weights algorithm that employs splitting experts. Namely, we start with a single expert, and when an expert makes a mistake it may split into two experts. The behavior of the experts is defined in Algorithms 6a and 6b.

**Assumptions:**

- $d \in \mathbb{N}, x \in T_d$ .
- $e = (S, u, H)$  is a tuple that defines an expert:
  - $S \subseteq T_d$  – a collection of nodes that could be on-path for the true labeling function given what the expert knows and assumes.
  - $u \in T_d$  – the deepest node known or assumed to be on-path by the expert.
  - $H \subseteq \{0, 1\}^{T_d}$  – the collection of all functions that could be the correct labeling function given what the expert knows and assumes.

**EXPERT.PREDICT**( $e, x$ ):

```

( $S, u, H$ )  $\leftarrow e$                                 ▷ Unpack the state that defines the expert.

if  $|H| \leq 2^{2\sqrt{d}}$ :
    return HALVING.PREDICT( $H, x$ )                ▷ Once  $H$  becomes small enough, simulate the
                                                    Halving algorithm (Algorithm 7). [Case I]
if  $x \preceq u$ :
    return  $b \in \{0, 1\}$  such that  $x \preceq_b u$     ▷  $u$  is assumed to be on-path. If  $u$  is a  $b$ -
                                                    descendant of  $x$ , then the correct label for
                                                     $x$  must be  $b$ . [Case II]

return  $\mathbb{1}\left(\frac{|\{x' \in S : x \preceq_1 x'\}|}{|S|} \geq \frac{1}{3}\right)$   ▷ If there is  $b \in \{0, 1\}$  such that at least a 1/3
                                                    of suspected on-path nodes are  $b$ -descendants
                                                    of  $x$ , then output  $b$ . Otherwise (when at least
                                                    2/3 of  $S$  are non-descendants of  $x$ ), output 0.
                                                    [Cases III to VI]
```

Algorithm 6a: A subroutine of Algorithm 5 that defines how an expert makes predictions.

**Assumptions:**

- $d, x, e, S, u, H$  – as in Algorithm 6a.
- $y$  – the correct label for  $x$ , as selected by the adversary.

EXPERT.UPDATE( $e, x, y$ ):

|                                                              |                                                                                                                                                                               |
|--------------------------------------------------------------|-------------------------------------------------------------------------------------------------------------------------------------------------------------------------------|
| $(S, u, H) \leftarrow e$                                     | ▷ Unpack the state that defines the expert.                                                                                                                                   |
| $H \leftarrow \text{HALVING.UPDATE}(H, x, y)$                | ▷ Update the version space, as in the Halving algorithm (Algorithm 7).                                                                                                        |
| <b>if</b> $ H  \leq 2^{2\sqrt{d}}$ :                         | ▷ If the version space is small, we just simulate the Halving algorithm, so the update is complete. [Case III]                                                                |
| <b>return</b> $\{(S, u, H)\}$                                |                                                                                                                                                                               |
| <b>for</b> $b \in \{0, 1\}$ :                                |                                                                                                                                                                               |
| $S_b \leftarrow \{x' \in S : x \preceq_b x'\}$               | ▷ Set of suspected on-path nodes that are $b$ -descendant of $x$ .                                                                                                            |
| <b>if</b> $ S_{(1-y)} / S  \geq 1/3$ :                       |                                                                                                                                                                               |
| $S' \leftarrow S \setminus S_{(1-y)}$                        | ▷ At least 1/3 of suspected on-path nodes were $b$ -                                                                                                                          |
| <b>return</b> $\{(S', u, H)\}$                               | descendants of $x$ , and therefore the expert predicted label $\hat{y} = b$ . But the correct label was $y = 1 - b$ . Remove all $b$ -descendants of $x$ from $S$ . [Case IV] |
| <b>else:</b>                                                 |                                                                                                                                                                               |
| $S_{\notin} \leftarrow S; u_{\notin} \leftarrow u$           | ▷ Split $e$ in two. First, construct $e_{\notin}$ to be an                                                                                                                    |
| $H_{\notin} = \{h \in H : x \notin \text{path}(h)\}$         | updated version of $e$ after adding the assumption                                                                                                                            |
| $e_{\notin} \leftarrow (S_{\notin}, u_{\notin}, H_{\notin})$ | that $x \notin \text{path}(h)$ for the correct labeling function $h$ .                                                                                                        |
| $S_{\in} \leftarrow S_0 \cup S_1$                            | ▷ Next, construct $e_{\in}$ to be an updated version                                                                                                                          |
|                                                              | of $e$ adding the assumption $x \in \text{path}(h)$ . $S_{\in}$ contains only nodes that are descendants                                                                      |
|                                                              | of $x$ .                                                                                                                                                                      |
| $u_{\in} \leftarrow u$                                       | ▷ $u_{\in}$ represents updating the prior assumption                                                                                                                          |
| <b>if</b> $u_{\in} \preceq x$ :                              | that $u$ is on path by adding that $x$ is also on                                                                                                                             |
| $u_{\in} \leftarrow x$                                       | path.                                                                                                                                                                         |
| $H_{\in} = \{h \in H : x \in \text{path}(h)\}$               | ▷ $H_{\in}$ is obtained by updating the version                                                                                                                               |
|                                                              | space to include only function where $x$ is                                                                                                                                   |
|                                                              | on path.                                                                                                                                                                      |
| $e_{\in} \leftarrow (S_{\in}, u_{\in}, H_{\in})$             |                                                                                                                                                                               |
| <b>return</b> $\{e_{\notin}, e_{\in}\}$                      | ▷ [Cases V and VI]                                                                                                                                                            |

Algorithm 6b: A subroutine of Algorithm 5 that defines how an expert is updated (and possibly split into two) when it makes a mistake.

**Assumptions:**

- $\mathcal{X}$  a set,  $k \in \mathbb{N}$ .
- $\mathcal{H} \subseteq \{0, 1\}^{\mathcal{X}}$ .
- $x, x_1, \dots, x_k \in \mathcal{X}, y \in \{0, 1\}$ .

HALVING( $\mathcal{H}, (x_1, x_2, \dots, x_k)$ ):

$\mathcal{H}_1 \leftarrow \mathcal{H}$

**for**  $i \in [k]$ :

$\hat{y}_i \leftarrow \text{HALVING.PREDICT}(\mathcal{H}, x_i)$

**send** prediction  $\hat{y}_i$  to adversary

**receive** correct label  $y_i \in \{0, 1\}$  from adversary

$\mathcal{H}_{i+1} \leftarrow \text{HALVING.UPDATE}(\mathcal{H}_i, x_i, y_i)$

HALVING.PREDICT( $\mathcal{H}, x$ ):

**return**  $\mathbb{1}(\sum_{h \in \mathcal{H}} h(x) \geq \frac{1}{2})$

HALVING.UPDATE( $\mathcal{H}, x, y$ ):

**return**  $\{h \in \mathcal{H} : h(x) = y\}$

Algorithm 7: This is the well-known halving algorithm. The experts in Algorithms 6a and 6b simulate this algorithm once their version space becomes small enough.

#### 819 D.4 Analysis

820 In this section we prove our main result, Theorem D.1.

##### 821 D.4.1 Assumption-Consistent Expert

822 Occasionally, when an expert is updated, it makes an assumption about whether the most-recently  
 823 presented node  $x_t$  is on-path or off-path with respect to the true labeling function  $h$ . In these  
 824 updates, the expert is split into two: one expert assumes that  $x_t \in \text{path}(h)$ , and the other assumes  
 825  $x_t \notin \text{path}(h)$ . Clearly, by splitting into two in this manner, we preserve the invariant that the set of  
 826 experts always contains a ‘vindicated’ expert  $e^*$  such that all the assumptions made by  $e^*$  are correct.  
 827 This simple observation is made formal in the following definition and claim.

828 **Definition D.3** (Assumption consistency). *For an expert  $e \in E_{t+1}$  with  $\text{ancestry}(e) =$   
 829  $(e_1, e_2, \dots, e_{t+1})$ , and an index  $i \in [t]$ , we say that the  $i \rightarrow (i+1)$  update of  $e$  was assump-  
 830 tion-consistent with a function  $h : T_d \rightarrow \{0, 1\}$  if one of the following conditions hold:*

- 831 •  $e_{i+1} = e_i$ ; or
- 832 •  $e_{i+1}$  was the single expert returned by  $\text{EXPERT.UPDATE}(e_i, x_i, y_i)$ ; or
- 833 •  $\text{EXPERT.UPDATE}(e_i, x_i, y_i)$  returned two experts  $(S_{\in}, u_{\in}, H_{\in})$  and  $(S_{\notin}, u_{\notin}, H_{\notin})$  (as in  
 834 the third return statement of  $\text{EXPERT.UPDATE}$ ), and furthermore,

$$e_{i+1} = \begin{cases} (S_{\in}, u_{\in}, H_{\in}) & x_i \in \text{path}(h) \\ (S_{\notin}, u_{\notin}, H_{\notin}) & x_i \notin \text{path}(h). \end{cases} \quad (18)$$

835 We say that an expert  $e \in E_{t+1}$  is assumption-consistent with  $h$  if for all  $i \in [t]$ , the  $i \rightarrow (i+1)$   
 836 update of  $e$  was assumption-consistent with  $h$ .

837 **Claim D.4** (Existence of assumption-consistent expert). *Let  $d, n, t \in \mathbb{N}$ ,  $t \leq n$ , let  $\mathcal{H} \subseteq \{0, 1\}^{T_d}$ , let*  
 838  *$x_1, \dots, x_n \in T_d$ , and let  $h : T_d \rightarrow \{0, 1\}$ . Consider an execution of*

$$\text{TRANSDUCTIVELEARNER}(\mathcal{H}, d, (x_1, x_2, \dots, x_n))$$

839 *as in Algorithm 5. Then, at the end of the  $t$ -th iteration of the outer ‘for’ loop in TRANSDUCTIVE-*  
 840 *LEARNER, there exists a unique expert  $e_{t+1}^* \in E_{t+1}$  that is assumption-consistent with  $h$ .*

841 *Proof.* We prove by induction that, for all  $s \in [t + 1]$ ,  $E_s$  contains a unique expert that is assumption-  
 842 consistent with  $h$ . The base case  $s = 1$  is clear, because  $E_1$  contains only a single expert that was  
 843 never modified. For the induction step, let  $e_s^*$  be the unique assumption-consistent expert in  $E_s$ , and  
 844 consider the  $s \rightarrow (s + 1)$  update. Notice that by Definition D.3,

- 845 • For all  $e \in E_s \setminus \{e_s^*\}$ , every expert  $e' \in E_{s+1}$  such that  $e' = e$  or  $e'$  was created by  
 846 executing  $\text{EXPERT.UPDATE}(e_s, x_s, y_s)$  is not assumption-consistent with  $h$ ; and
- 847 • Either  $\text{EXPERT.UPDATE}(e_s^*, x_s, y_s)$  is not executed and  $e_s^* \in E_{s+1}$  ( $e_s^*$  is added  
 848 to  $E_{s+1}$  without any modification), or precisely one of the experts created by  
 849  $\text{EXPERT.UPDATE}(e_s^*, x_s, y_s)$  and added to  $E_{s+1}$  is assumption-consistent with  $h$ .

850 Seeing as the  $s \rightarrow (s + 1)$  update executes at most  $\text{EXPERT.UPDATE}(e, x_s, y_s)$  once for each  $e \in E_s$ ,  
 851 it follows that  $E_{s+1}$  contains precisely one expert that is assumption-consistent with  $h$ .  $\square$

852 An expert  $e = (S, u, H)$  that is assumption-consistent with the correct labeling function enjoys two  
 853 simple properties. The first property is that the node  $u$  in the expert encodes correct information  
 854 about which previously seen nodes are on-path for the correct labeling function.

855 The second property is that the set  $S$  contains all future nodes that are on-path for the correct labeling  
 856 function and are also deeper in the tree than all nodes assumed to be on-path so far. These two  
 857 properties are formalized in the following claim.

858 **Claim D.5** (Properties of assumption-consistent expert). *Let  $d, n, t \in \mathbb{N}$ ,  $t \leq n + 1$ , let  $\mathcal{H} \subseteq \{0, 1\}^{T_d}$ ,*  
 859 *let  $x_1, \dots, x_n \in T_d$ . Consider an execution of*

$$\text{TRANSDUCTIVELEARNER}(\mathcal{H}, d, (x_1, x_2, \dots, x_n))$$

860 *as in Algorithm 5. Assume that the adversary selects labels  $y_1, y_2, \dots, y_n \in \{0, 1\}$  that are consistent*  
 861 *with some function  $h : T_d \rightarrow \{0, 1\}$ . Let  $e_t^* = (S_t^*, u_t^*, H_t^*) \in E_t$  be the unique expert in  $E_t$  that is*  
 862 *assumption-consistent with  $h$ .<sup>26</sup> Then the following two properties hold:*

- 863 1.  $u_t^* \in \text{path}(h)$ .
- 864 2.  $\{x \in \{x_t, x_{t+1}, \dots, x_{t_{\max}}\} : x \in \text{path}(h) \wedge x \not\preceq u_t^*\} \subseteq S_t^*$ .

865 *Proof of Claim D.5.* The proof proceeds by induction on  $t$ . For the base case  $t = 1$ ,  $E_1$  contains  
 866 a single expert  $e_1^* = (S_1^*, u_1^*, H_1^*)$  where  $u_1^* = \lambda$  is the root of  $T_d$ . Indeed,  $\lambda \in \text{path}(h)$  for  
 867 any function  $h : T_d \rightarrow \{0, 1\}$ . This establishes the base case for Item 1. Additionally,  $S_1^* =$   
 868  $\{x_1, x_2, \dots, x_{t_{\max}}\}$ , satisfying the base case for Item 2.

869 For the induction step, we assume that the claim holds for some integer  $t = i$ , and show that it  
 870 holds for  $t = i + 1$  as well. First, we establish Item 1. If  $e_{i+1}^* = e_i^*$ , then the claim is immediate.  
 871 Otherwise, by Definition D.3 and the first two return statements in  $\text{EXPERT.UPDATE}$ , either  
 872  $e_{i+1}^* = (S_{i+1}^*, u_{i+1}^*, H_{i+1}^*)$  has  $u_{i+1}^* = u_i^* \in \text{path}(h)$ , in which case the claim is immediate, or else  
 873  $e_{i+1}^*$  satisfies Eq. (18), namely,

$$e_{i+1}^* = \begin{cases} (S_{\in}, u_{\in}, H_{\in}) & x_i \in \text{path}(h) \\ (S_{\notin}, u_{\notin}, H_{\notin}) & x_i \notin \text{path}(h). \end{cases}$$

874 As defined in  $\text{EXPERT.UPDATE}$ ,  $u_{\in}$  is equal either to  $u_i^*$  or to  $x_i$ , so if  $x_i \in \text{path}(h)$  then

$$u_{i+1}^* = u_{\in} \in \{u_i^*, x_i\} \subseteq \text{path}(h).$$

<sup>26</sup>Recall that  $e_t^*$  exists by Claim D.4.

On the other hand, if  $x_i \notin \text{path}(h)$  then we get  $u_{i+1}^* = u_{\notin} = u_i^* \in \text{path}(h)$ . We see that in all cases,  $u_{i+1}^* \in \text{path}(h)$  as desired. This concludes the proof of Item 1.

For Item 2, again, if  $e_{i+1}^* = e_i^*$ , then the claim is immediate. Otherwise, consider the various ways in which  $u_{i+1}^*$  and  $S_{i+1}^*$  can be assigned by EXPERT.UPDATE. In the first return statement,  $u_{i+1}^* = u_i^*$  and  $S_{i+1}^* = S_i^*$ , and the claim is immediate.

The second return statement assigns  $u_{i+1}^* = u_i^*$  and  $S_{i+1}^* = S_i^* \setminus S_{1-y_i}$ , where  $S_{1-y_i}$  is the set of  $(1 - y_i)$ -descendants of  $x_i$  (including  $x_i$  itself). Notice that regardless of whether  $x_i$  is on-path for the correct labeling function  $h$  or not, none of the  $(1 - y_i)$ -descendants of  $x_i$  (except possibly  $x_i$  itself) can be on-path for  $h$ , because  $h$  assigns a label  $y_i$  to  $x_i$ . And seeing as Item 2 only requires that  $S_{i+1}^*$  contain nodes from  $\{x_{i+1}, x_{i+2}, \dots, x_{t_{\max}}\}$ , it is also safe to remove  $x_i$ . Therefore, removing  $S_{1-y_i}$  preserves Item 2.

For the third return statement, there are two possibilities. The first possibility is that  $u_{i+1}^* = u_{\notin} = u_i^*$  and  $S_{i+1}^* = S_{\notin} = S_i^*$ , in which case the claim is immediate. The second possibility assigns  $u_{i+1}^* = u_{\in}$ , and  $S_{i+1}^* = S_{\in} = S_0 \cup S_1$ , namely,  $S_{i+1}^*$  is constructed by removing the non-descendants of  $x_i$  from  $S_i^*$ . By Eq. (18), this happens when  $x_i \in \text{path}(h)$ , so all non-descendants of  $x_i$  or either off-path for  $h$ , or they are ancestors of  $x_i$ . Seeing as  $x_i \in \text{path}(h)$  and  $u_i^* \in \text{path}(h)$ , and  $u_{\in}$  is the deeper node between these two, any node that is an ancestor of  $x_i$  is also an ancestor of  $u_{i+1}^* = u_{\in}$ . Thus, all the nodes removed or either off-path for  $h$ , or they are ancestors of  $u_{i+1}^*$ , satisfying Item 2. (Similarly, any node that is an ancestor of  $u_i^*$  is also an ancestor of  $u_{i+1}^*$ , so we do not need to add any new nodes to  $S_{i+1}^*$  that are not included in  $S_i^*$ .)

We see that in all cases, Item 2 is preserved, as desired.  $\square$

#### D.4.2 Transition to Halving

**Claim D.6.** Let  $d, n, t \in \mathbb{N}$ ,  $d \geq 16$ , let  $\mathcal{H} \subseteq \{0, 1\}^{T_d}$ , and let  $x_1, \dots, x_n \in T_d$ . Consider an execution of

$$\text{TRANSDUCTIVELEARNER}(\mathcal{H}, (x_1, x_2, \dots, x_n))$$

as in Algorithm 5. Let  $t > t_{\max} = 2^{4\sqrt{d}}$  and let  $e = (S, u, H) \in E_t$  be an expert. Then

$$|H| \leq 2^{2\sqrt{d}}.$$

*Proof of Claim D.6.* Assume for contradiction that  $|H| > 2^{2\sqrt{d}}$ . Let  $H' \subseteq H$  be an arbitrary subset of size  $2^{2\sqrt{d}} + 1$ . Let

$$P = \cup_{h \in H'} \text{path}(h).$$

Seeing as each root-to-leaf path contains  $d + 1$  nodes,

$$|P| \leq |H'| \cdot (d + 1) \leq (2^{2\sqrt{d}} + 1) \cdot (d + 1) \leq d2^{2\sqrt{d}+1}. \quad (19)$$

Let  $y_1, y_2, \dots, y_t$  be the labels provided by the adversary in the first  $t_{\max}$  iterations. The line in EXPERT.UPDATE constructing  $H$  using HALVING.UPDATE( $H, x, y$ ) ensures that

$$\forall h \in H \forall i \in [t_{\max}] : h(x_i) = y_i. \quad (20)$$

Consider two cases:

• **Case I.**  $\sum_{i=1}^{t_{\max}} y_i \leq t_{\max}/2$ . Then the set

$$X_0 = \{x_i : i \in [t_{\max}] \wedge y_i = 0\}$$

has cardinality  $|X_0| \geq t_{\max}/2$ . Let  $X'_0 = X_0 \setminus P$ . By Eq. (19),

$$|X'_0| \geq \frac{t_{\max}}{2} - d2^{2\sqrt{d}+1} = 2^{4\sqrt{d}} - d2^{2\sqrt{d}+1}. \quad (21)$$

From the choice of  $X'_0$ , the inclusion  $H' \subseteq H$ , and Eq. (20),

$$\forall h \in H' \forall x \in X'_0 : x \notin \text{path}(h) \wedge h(x) = 0. \quad (22)$$

909 Seeing as  $|H'| > 2^{2\sqrt{d}}$ , Eq. (22) and Item 1 from Lemma D.2 imply that

$$|X'_0| \leq 2^{2\sqrt{d}}. \quad (23)$$

910 Combining Eqs. (21) and (23) yields

$$\begin{aligned} 2^{2\sqrt{d}} &\geq |X'_0| \geq 2^{4\sqrt{d}} - d2^{2\sqrt{d}+1} \\ &\geq 2^{4\sqrt{d}-1} \end{aligned} \quad (d \geq 16),$$

911 which is a contradiction.

912 • **Case II.**  $\sum_{i=1}^{t_{\max}} y_i > t_{\max}/2$ . A similar argument gives a contradiction by defining

$$X_1 = \{x_i : i \in [t_{\max}] \wedge y_i = 1\}, \text{ and } X'_1 = X_1 \setminus P.$$

913 As before,

$$|X'_1| \geq \frac{t_{\max}}{2} - d2^{2\sqrt{d}+1} \geq 2^{4\sqrt{d}} - d2^{2\sqrt{d}+1}. \quad (24)$$

914 for all  $d \in \mathbb{N}$ . However,  $|H'| > 2^{2\sqrt{d}}$  and Item 2 imply that

$$|X'_1| < 3\sqrt{d}, \quad (25)$$

915 which is a contradiction.  $\square$

#### 916 D.4.3 Performance of Best Expert

917 **Claim D.7** (Existence of expert with large weight). *Let  $d, n \in \mathbb{N}$ ,  $d \geq 16$ , let  $\mathcal{H} \subseteq \{0, 1\}^{T_d}$ , and let*  
 918  *$x_1, \dots, x_n \in T_d$ . Consider an execution of*

$$\text{TRANSDUCTIVELEARNER}(\mathcal{H}, (x_1, x_2, \dots, x_n))$$

919 *as in Algorithm 5. Then, at the end of the execution, there exists  $e \in E_{n+1}$  such that*

$$w(e) \geq 2^{-48\sqrt{d}}.$$

920 Note that the lower bound in Claim D.7 does not depend on  $n$ .

921 *Proof.* Fix a hypothesis  $h \in \mathcal{H}$  such that  $h(x_t) = y_t$  for all  $t \in [n]$  (such an  $h$  exists because the  
 922 adversary must always select a realizable label).

923 By Claim D.4, there exists  $e_{n+1}^* \in E_{n+1}$  that is assumption-consistent with  $h$ . Let  $\text{ancestry}(e_{n+1}^*) =$   
 924  $(e_1^*, e_2^*, \dots, e_{n+1}^*)$ . We argue that this ancestry sequence makes few mistakes. Specifically, for each  
 925  $t \in [n]$ , let  $\hat{y}_t^* = \text{EXPERT.PREDICT}(e_t^*, x_t)$ . We claim that

$$m = \sum_{t=1}^n \mathbb{1}(\hat{y}_t^* \neq y_t) \leq 24\sqrt{d}.$$

926 Indeed, let  $B = \{t \in [n] : \hat{y}_t^* \neq y_t\}$  be the set of  $m$  indices where a mistake was made. For  
 927 each  $t \in B$ , let  $e_t^* = (S, u, H)$ , and note that each  $t \in B$  has a corresponding execution of  
 928  $\text{EXPERT.PREDICT}(e_t^*, x_t)$ , and an execution of  $\text{EXPERT.UPDATE}(e_t^*, x_t, y_t)$  that produces  $e_{t+1}^*$ . We  
 929 partition the indices in  $B$  into six cases (six sets), and bound the number of indices that fall in each.

930 • **Case I.** *The execution of  $\text{EXPERT.PREDICT}(e_t^*, x_t)$  exited via the first return statement in that*  
 931 *procedure. This happens once  $|H| \leq 2^{2\sqrt{d}}$ , and from that point on, the expert and*  
 932 *all subsequent experts in the ancestry are exactly simulating the HALVING algorithm*  
 933 *(Algorithm 7) in both predictions and updates. Hence, by Fact E.1,  $B$  contains at most*  
 934  *$m_I = 2\sqrt{d}$  such indices.*

935 • **Case II.** *The execution of  $\text{EXPERT.PREDICT}(e_t^*, x_t)$  exited via the second return statement in*  
 936 *that procedure. In particular  $x \preceq u$ , and the predicted label was  $\hat{y}_t^* = b \in \{0, 1\}$  such*  
 937 *that  $x_t \preceq_b u$ . Because  $e_t^*$  is assumption-consistent with  $h$ , Item 1 in Claim D.5 implies*  
 938 *that  $u \in \text{path}(h)$ . Namely, we see that  $u$  is a  $b$ -descendant of  $x_t$  and  $u \in \text{path}(h)$ . It*  
 939 *follows that  $\hat{y}_t^* = b = h(x_t) = y_t$ . So no mistakes are made in Case II, and the number*  
 940 *of indices  $t \in B$  that belong to Case II is simply  $m_{II} = 0$ .*

941 In the remaining cases, we assume that  $\text{EXPERT.PREDICT}(e_t^*, x_t)$  exited via the third return statement  
 942 in that procedure, so the prediction was

$$\hat{y}_t^* = \mathbb{1}\left(\frac{|S_1|}{|S|} \geq \frac{1}{3}\right), \quad (26)$$

943 where  $S_1 = \{x' \in S : x_t \preccurlyeq_1 x'\}$ . These cases are as follows.

944 • **Case III.** *The execution of  $\text{EXPERT.UPDATE}(e_t^*, x_t, y_t)$  exited via the first return statement in*  
 945 *that procedure.* Namely, after the update, the resulting expert  $e_{t+1}^*$  has  $|H| \leq 2^{2\sqrt{d}}$ .  
 946 However, because we are not in Case I, at the beginning of the iteration expert  $e_t^*$  had  
 947  $|H| > 2^{2\sqrt{d}}$ . Seeing as the cardinality of  $H$  decreases monotonically throughout the  
 948 ancestry  $e_1^*, \dots, e_{n+1}^*$ , this type of mistake can happen at most  $m_{\text{III}} = 1$  times.

949 • **Case IV.** *The execution of  $\text{EXPERT.UPDATE}(e_t^*, x_t, y_t)$  exited via the second return statement*  
 950 *in that procedure.* In this case,  $|S_{(1-y_t)}|/|S| \geq 1/3$ , and  $e_{t+1}^* = (\bar{S}', u, \bar{H})$  with  
 951  $S' = S \setminus S_{1-y_t}$ . So  $|S'| \leq 2|S|/3$ . Namely, the update causes the cardinality of the  
 952 set  $S$  to be multiplied by a factor of at most  $2/3$  and it strictly decreases. Seeing as the  
 953 initial cardinality is  $t_{\max}$ , and cardinalities are integers, the number of times this can  
 954 happen is at most

$$m_{\text{IV}} = \frac{\log(t_{\max})}{\log(3/2)} + 1 = \frac{4\sqrt{d}}{\log(3/2)} + 1. \quad (27)$$

955 In the remaining cases, we assume that the execution of  $\text{EXPERT.UPDATE}(e_t^*, x_t, y_t)$  exited via the  
 956 third return statement in that procedure. This implies that

$$|S_{\hat{y}_t^*}|/|S| < 1/3 \quad (28)$$

957 Combining this with Eq. (26), it follows  $\hat{y}_t^* = 0$  and therefore  $y_t = 1$ . The remaining cases are as  
 958 follows.

959 • **Case V.**  $x_t \in \text{path}(h)$ . Let  $e_t^* = (S, u, H)$ . Seeing as  $|H| > 2^{2\sqrt{d}}$  (because we are not in  
 960 Case I), Claim D.6 (with the assumption  $d \geq 16$ ) implies that  $t \leq t_{\max}$ . By Item 2  
 961 of Claim D.5, the facts  $x_t \not\preccurlyeq u$  (we are not in Case II) and  $x_t \in \text{path}(h)$  imply that  
 962  $x_t \in S$ . In particular,  $S$  is not empty.

963 Because the  $t \rightarrow (t+1)$  update of  $e_{t+1}^*$  was assumption-consistent with  $h$ , Eq. (18)  
 964 implies that  $e_{t+1}^* = (S_{\in}, u_{\in}, H_{\in})$ , with  $S_{\in} = S_0 \cup S_1$ . Observe that

- 965 •  $|S_0|/|S| < 1/3$  (plugging  $\hat{y}_t^* = 0$  into Eq. (28)); and
- 966 •  $|S_1|/|S| < 1/3$  (because otherwise, by Eq. (26), the prediction would have been  
 967  $\hat{y}_t^* = 1$ ).

968 Therefore,

$$|S_{\in}| \leq |S_0| + |S_1| \leq 2|S|/3. \quad (29)$$

969 As in Case IV, combining Eq. (29) and the fact that  $S$  is not empty imply an upper  
 970 bound  $m_{\text{V}}$  on the number of times Case V can happen, with the bound being the same  
 971 number  $m_{\text{V}} = m_{\text{IV}}$  as in Eq. (27).

972 • **Case VI.**  $x_t \notin \text{path}(h)$ . So  $(x_t, y_t)$  is a pair such that  $x_t \notin \text{path}(h)$  and  $y_t = 1$ . Assume for  
 973 contradiction that this type of mistake can happen strictly more than

$$m_{\text{VI}} = 3\sqrt{d}$$

974 times. Let  $t_1, t_2, \dots, t_{m_{\text{VI}}}$  be the indices of the first  $m_{\text{VI}}$  iterations of the outer ‘for’  
 975 loop of  $\text{TRANSDUCTIVELEARNER}$  in which this type of mistake happened. Note that  
 976 if at the end of iteration  $t_{m_{\text{VI}}}$ , we had expert  $e_{t_{m_{\text{VI}}}+1}^* = (S_{t_{m_{\text{VI}}}+1}, u_{t_{m_{\text{VI}}}+1}, H_{t_{m_{\text{VI}}}+1})$   
 977 such that  $|H_{t_{m_{\text{VI}}}+1}| \leq 2^{2\sqrt{d}}$ , then from that point onwards, the expert would be  
 978 simulating the halving algorithm, and in particular, it would not make any further  
 979 mistake of the type in Case VI (all subsequent mistakes would belong to Case I). Hence,



980 by the assumption that strictly more than  $m_{\text{VI}}$  mistakes were made, it follows that  
 981  $|H_{t_{m_{\text{VI}}+1}}| > 2^{2\sqrt{d}}$ . Let

$$H^* = \{h' \in \mathcal{H} : (\forall t \in [m_{\text{VI}}] : h'(x_t) = 1 \wedge x_t \notin \text{path}(h'))\}.$$

982 Because  $e_{t_{m_{\text{VI}}+1}}^*$  is assumption-consistent with  $h$ , and from the construction of  $H_{t_{m_{\text{VI}}+1}}$   
 983 using  $H_{\in}$  and  $H_{\notin}$  in EXPERT.UPDATE, it follows that  $H_{t_{m_{\text{VI}}+1}} \subseteq H^*$ . So there exist  
 984 collections  $H^* \subseteq \mathcal{H}$  and  $X = \{x_t : t \in [m_{\text{VI}}]\} \subseteq T_d$  such that

- 985 •  $|H^*| \geq |H_{t_{m_{\text{VI}}+1}}| > 2^{2\sqrt{d}}$ ,
- 986 •  $|X| = m_{\text{VI}} = 3\sqrt{d}$ ,
- 987 •  $\forall h' \in H^* \forall x \in X : h'(x) = 1$ .
- 988 •  $\forall h' \in H^* \forall x \in X : x \notin \text{path}(h')$ .

989 This is a contradiction to the choice of  $\mathcal{H}$ , specifically, to Item 2 in Lemma D.2.

990 Thus, combining the analysis of all cases, we see that the number of mistakes made by the  
 991 ancestry( $e_{n+1}^*$ ) is at most

$$\begin{aligned} m &\leq m_{\text{I}} + m_{\text{II}} + m_{\text{III}} + m_{\text{IV}} + m_{\text{V}} + m_{\text{VI}} \\ &\leq 2\sqrt{d} + 0 + 1 + \left( \frac{4\sqrt{d}}{\log(3/2)} + 1 \right) + \left( \frac{4\sqrt{d}}{\log(3/2)} + 1 \right) + 3\sqrt{d} \\ &\leq 24\sqrt{d}. \end{aligned}$$

992 The weights satisfy

$$w(e_{t+1}^*) \begin{cases} = w(e_t^*) & \hat{y}_t^* = y_t \\ \geq \frac{1}{4} \cdot w(e_t^*) & \hat{y}_t^* \neq y_t. \end{cases}$$

993 This implies that  $w(e_{n+1}^*) \geq w(e_1^*) \cdot \prod_{t=1}^n 4^{-\mathbb{1}(\hat{y}_t \neq y_t)} = w(e_1^*) \cdot 4^{-m} \geq 4^{-24\sqrt{d}} = 2^{-48\sqrt{d}}$ , as  
 994 desired.  $\square$

#### 995 D.4.4 Multiplicative Weights Mistake Bound

996 **Claim D.8** (Mistake bound for multiplicative weights). *Let  $d, n \in \mathbb{N}$ , let  $\alpha > 0$ , let  $\mathcal{H} \subseteq \{0, 1\}^{T_d}$ ,  
 997 and let  $x_1, \dots, x_n \in T_d$ . Consider an execution of*

$$\text{TRANSDUCTIVELEARNER}(\mathcal{H}, (x_1, x_2, \dots, x_n))$$

998 *as in Algorithm 5. Assume that at the end of the execution, there exists  $e^* \in E_{n+1}$  such that*

$$w(e^*) \geq 2^{-\alpha}.$$

999 *Then TRANSDUCTIVELEARNER makes at most  $\alpha$  mistakes.*

1000 *Proof of Claim D.8.* For all  $i \in [n+1]$ , let  $w(E_i) = \sum_{e \in E_i} w(e)$ . For each  $i \in [n]$ , if  $\hat{y}_i \neq y_i$ , then  
 1001  $w(E_{i+1}) \leq w(E_i)/2$ . Hence, if TRANSDUCTIVELEARNER makes  $m$  mistakes, then by induction

$$w(E_{n+1}) \leq w(E_1) \cdot \prod_{t=1}^n 2^{-\mathbb{1}(\hat{y}_t \neq y_t)} = 2^{-m} \cdot w(E_1).$$

1002 So

$$2^{-\alpha} \leq w(e^*) \leq \sum_{e \in E_{n+1}} w(e) = w(E_{n+1}) \leq 2^{-m} \cdot w(E_1) = 2^{-m}.$$

1003 We conclude that

$$m \leq \alpha,$$

1004 as desired.  $\square$

## 1005 D.5 Proof

1006 *Proof of Theorem D.1.* Fix an integer  $d \geq 23$ . Let  $\mathcal{H} \subseteq \{0, 1\}^{T_{d-1}}$  be the class constructed by  
 1007 invoking Lemma D.2 for the integer  $d - 1 \geq 22$ . We argue that this class satisfies the requirements  
 1008 of Theorem D.1.

1009 By construction,  $\mathcal{H}$  is a class of Littlestone dimension precisely  $d$ . By Theorem A.7, this implies the  
 1010 equality in Item 2.

1011 We now show the upper bound in Item 1. We argue that TRANSDUCTIVELERARNER (Algorithm 5)  
 1012 satisfies this upper bound. By Claim D.7, at the end of the execution of TRANSDUCTIVELERARNER  
 1013 there exists an expert  $e \in E_{n+1}$  such that  $w(e) \geq 2^{-48\sqrt{d}}$ . By Claim D.8, this implies that the  
 1014 number of mistakes made by TRANSDUCTIVELERARNER is at most  $48\sqrt{d}$ , as desired.  $\square$

## 1015 E Halving

1016 **Fact E.1.** Let  $\mathcal{X}$  be a set, and let  $\mathcal{H} \subseteq \{0, 1\}^{\mathcal{X}}$  be a hypothesis class. Then for all  $n \in \mathbb{N}$ , all  
 1017 sequences  $x \in \mathcal{X}^n$ , and all realizable adversaries, HALVING (Algorithm 7) makes at most  $\log(|\mathcal{H}|)$   
 1018 mistakes in the transductive online learning (Game 2).<sup>27</sup> Namely,

$$\sup_{n \in \mathbb{N}} \sup_{A \in \mathcal{A}_n} M_{\text{tr}}(\mathcal{H}, n, \text{HALVING}, A) \leq \log(|\mathcal{H}|).$$

---

<sup>27</sup>With the suitable syntactic modification, it also makes at most  $\log(|\mathcal{H}|)$  mistakes in the standard online learning (Game 1).

## 1019 **NeurIPS Paper Checklist**

### 1020 **1. Claims**

1021 Question: Do the main claims made in the abstract and introduction accurately reflect the  
1022 paper’s contributions and scope?

1023 Answer: [\[Yes\]](#)

1024 Justification: The main claims made in the abstract and introduction accurately reflect the  
1025 paper’s contributions and scope.

1026 Guidelines:

- 1027 • The answer NA means that the abstract and introduction do not include the claims  
1028 made in the paper.
- 1029 • The abstract and/or introduction should clearly state the claims made, including the  
1030 contributions made in the paper and important assumptions and limitations. A No or  
1031 NA answer to this question will not be perceived well by the reviewers.
- 1032 • The claims made should match theoretical and experimental results, and reflect how  
1033 much the results can be expected to generalize to other settings.
- 1034 • It is fine to include aspirational goals as motivation as long as it is clear that these goals  
1035 are not attained by the paper.

### 1036 **2. Limitations**

1037 Question: Does the paper discuss the limitations of the work performed by the authors?

1038 Answer: [\[NA\]](#)

1039 Justification: Purely rigorous mathematical results. We explain precisely what our proofs  
1040 imply (and therefore also what they do not imply).

1041 Guidelines:

- 1042 • The answer NA means that the paper has no limitation while the answer No means that  
1043 the paper has limitations, but those are not discussed in the paper.
- 1044 • The authors are encouraged to create a separate "Limitations" section in their paper.
- 1045 • The paper should point out any strong assumptions and how robust the results are to  
1046 violations of these assumptions (e.g., independence assumptions, noiseless settings,  
1047 model well-specification, asymptotic approximations only holding locally). The authors  
1048 should reflect on how these assumptions might be violated in practice and what the  
1049 implications would be.
- 1050 • The authors should reflect on the scope of the claims made, e.g., if the approach was  
1051 only tested on a few datasets or with a few runs. In general, empirical results often  
1052 depend on implicit assumptions, which should be articulated.
- 1053 • The authors should reflect on the factors that influence the performance of the approach.  
1054 For example, a facial recognition algorithm may perform poorly when image resolution  
1055 is low or images are taken in low lighting. Or a speech-to-text system might not be  
1056 used reliably to provide closed captions for online lectures because it fails to handle  
1057 technical jargon.
- 1058 • The authors should discuss the computational efficiency of the proposed algorithms  
1059 and how they scale with dataset size.
- 1060 • If applicable, the authors should discuss possible limitations of their approach to  
1061 address problems of privacy and fairness.
- 1062 • While the authors might fear that complete honesty about limitations might be used by  
1063 reviewers as grounds for rejection, a worse outcome might be that reviewers discover  
1064 limitations that aren’t acknowledged in the paper. The authors should use their best  
1065 judgment and recognize that individual actions in favor of transparency play an impor-  
1066 tant role in developing norms that preserve the integrity of the community. Reviewers  
1067 will be specifically instructed to not penalize honesty concerning limitations.

### 1068 **3. Theory assumptions and proofs**

1069 Question: For each theoretical result, does the paper provide the full set of assumptions and  
1070 a complete (and correct) proof?

Answer: [Yes]

Justification: For each theoretical result, the paper provides the full set of assumptions and a complete (and correct) proof.

Guidelines:

- The answer NA means that the paper does not include theoretical results.
- All the theorems, formulas, and proofs in the paper should be numbered and cross-referenced.
- All assumptions should be clearly stated or referenced in the statement of any theorems.
- The proofs can either appear in the main paper or the supplemental material, but if they appear in the supplemental material, the authors are encouraged to provide a short proof sketch to provide intuition.
- Inversely, any informal proof provided in the core of the paper should be complemented by formal proofs provided in appendix or supplemental material.
- Theorems and Lemmas that the proof relies upon should be properly referenced.

#### 4. Experimental result reproducibility

Question: Does the paper fully disclose all the information needed to reproduce the main experimental results of the paper to the extent that it affects the main claims and/or conclusions of the paper (regardless of whether the code and data are provided or not)?

Answer: [NA]

Justification: The paper has no experiments.

Guidelines:

- The answer NA means that the paper does not include experiments.
- If the paper includes experiments, a No answer to this question will not be perceived well by the reviewers: Making the paper reproducible is important, regardless of whether the code and data are provided or not.
- If the contribution is a dataset and/or model, the authors should describe the steps taken to make their results reproducible or verifiable.
- Depending on the contribution, reproducibility can be accomplished in various ways. For example, if the contribution is a novel architecture, describing the architecture fully might suffice, or if the contribution is a specific model and empirical evaluation, it may be necessary to either make it possible for others to replicate the model with the same dataset, or provide access to the model. In general, releasing code and data is often one good way to accomplish this, but reproducibility can also be provided via detailed instructions for how to replicate the results, access to a hosted model (e.g., in the case of a large language model), releasing of a model checkpoint, or other means that are appropriate to the research performed.
- While NeurIPS does not require releasing code, the conference does require all submissions to provide some reasonable avenue for reproducibility, which may depend on the nature of the contribution. For example
  - (a) If the contribution is primarily a new algorithm, the paper should make it clear how to reproduce that algorithm.
  - (b) If the contribution is primarily a new model architecture, the paper should describe the architecture clearly and fully.
  - (c) If the contribution is a new model (e.g., a large language model), then there should either be a way to access this model for reproducing the results or a way to reproduce the model (e.g., with an open-source dataset or instructions for how to construct the dataset).
  - (d) We recognize that reproducibility may be tricky in some cases, in which case authors are welcome to describe the particular way they provide for reproducibility. In the case of closed-source models, it may be that access to the model is limited in some way (e.g., to registered users), but it should be possible for other researchers to have some path to reproducing or verifying the results.

#### 5. Open access to data and code

1124 Question: Does the paper provide open access to the data and code, with sufficient instruc-  
 1125 tions to faithfully reproduce the main experimental results, as described in supplemental  
 1126 material?

1127 Answer: [NA]

1128 Justification: The paper does not include experiments requiring code.

1129 Guidelines:

- 1130 • The answer NA means that paper does not include experiments requiring code.
- 1131 • Please see the NeurIPS code and data submission guidelines ([https://nips.cc/  
 1132 public/guides/CodeSubmissionPolicy](https://nips.cc/public/guides/CodeSubmissionPolicy)) for more details.
- 1133 • While we encourage the release of code and data, we understand that this might not be  
 1134 possible, so “No” is an acceptable answer. Papers cannot be rejected simply for not  
 1135 including code, unless this is central to the contribution (e.g., for a new open-source  
 1136 benchmark).
- 1137 • The instructions should contain the exact command and environment needed to run to  
 1138 reproduce the results. See the NeurIPS code and data submission guidelines ([https:  
 1139 //nips.cc/public/guides/CodeSubmissionPolicy](https://nips.cc/public/guides/CodeSubmissionPolicy)) for more details.
- 1140 • The authors should provide instructions on data access and preparation, including how  
 1141 to access the raw data, preprocessed data, intermediate data, and generated data, etc.
- 1142 • The authors should provide scripts to reproduce all experimental results for the new  
 1143 proposed method and baselines. If only a subset of experiments are reproducible, they  
 1144 should state which ones are omitted from the script and why.
- 1145 • At submission time, to preserve anonymity, the authors should release anonymized  
 1146 versions (if applicable).
- 1147 • Providing as much information as possible in supplemental material (appended to the  
 1148 paper) is recommended, but including URLs to data and code is permitted.

1149 **6. Experimental setting/details**

1150 Question: Does the paper specify all the training and test details (e.g., data splits, hyper-  
 1151 parameters, how they were chosen, type of optimizer, etc.) necessary to understand the  
 1152 results?

1153 Answer: [NA]

1154 Justification: The paper does not include experiments.

1155 Guidelines:

- 1156 • The answer NA means that the paper does not include experiments.
- 1157 • The experimental setting should be presented in the core of the paper to a level of detail  
 1158 that is necessary to appreciate the results and make sense of them.
- 1159 • The full details can be provided either with the code, in appendix, or as supplemental  
 1160 material.

1161 **7. Experiment statistical significance**

1162 Question: Does the paper report error bars suitably and correctly defined or other appropriate  
 1163 information about the statistical significance of the experiments?

1164 Answer: [NA]

1165 Justification: The paper does not include experiments.

1166 Guidelines:

- 1167 • The answer NA means that the paper does not include experiments.
- 1168 • The authors should answer "Yes" if the results are accompanied by error bars, confi-  
 1169 dence intervals, or statistical significance tests, at least for the experiments that support  
 1170 the main claims of the paper.
- 1171 • The factors of variability that the error bars are capturing should be clearly stated (for  
 1172 example, train/test split, initialization, random drawing of some parameter, or overall  
 1173 run with given experimental conditions).
- 1174 • The method for calculating the error bars should be explained (closed form formula,  
 1175 call to a library function, bootstrap, etc.)

- The assumptions made should be given (e.g., Normally distributed errors).
- It should be clear whether the error bar is the standard deviation or the standard error of the mean.
- It is OK to report 1-sigma error bars, but one should state it. The authors should preferably report a 2-sigma error bar than state that they have a 96% CI, if the hypothesis of Normality of errors is not verified.
- For asymmetric distributions, the authors should be careful not to show in tables or figures symmetric error bars that would yield results that are out of range (e.g. negative error rates).
- If error bars are reported in tables or plots, The authors should explain in the text how they were calculated and reference the corresponding figures or tables in the text.

## 8. Experiments compute resources

Question: For each experiment, does the paper provide sufficient information on the computer resources (type of compute workers, memory, time of execution) needed to reproduce the experiments?

Answer: [NA]

Justification: The paper does not include experiments.

Guidelines:

- The answer NA means that the paper does not include experiments.
- The paper should indicate the type of compute workers CPU or GPU, internal cluster, or cloud provider, including relevant memory and storage.
- The paper should provide the amount of compute required for each of the individual experimental runs as well as estimate the total compute.
- The paper should disclose whether the full research project required more compute than the experiments reported in the paper (e.g., preliminary or failed experiments that didn't make it into the paper).

## 9. Code of ethics

Question: Does the research conducted in the paper conform, in every respect, with the NeurIPS Code of Ethics <https://neurips.cc/public/EthicsGuidelines>?

Answer: [Yes]

Justification: The research conducted in the paper conforms, in every respect, with the NeurIPS Code of Ethics.

Guidelines:

- The answer NA means that the authors have not reviewed the NeurIPS Code of Ethics.
- If the authors answer No, they should explain the special circumstances that require a deviation from the Code of Ethics.
- The authors should make sure to preserve anonymity (e.g., if there is a special consideration due to laws or regulations in their jurisdiction).

## 10. Broader impacts

Question: Does the paper discuss both potential positive societal impacts and negative societal impacts of the work performed?

Answer: [No]

Justification: The work is purely theoretical with no immediate direct societal impacts foreseeable.

Guidelines:

- The answer NA means that there is no societal impact of the work performed.
- If the authors answer NA or No, they should explain why their work has no societal impact or why the paper does not address societal impact.
- Examples of negative societal impacts include potential malicious or unintended uses (e.g., disinformation, generating fake profiles, surveillance), fairness considerations (e.g., deployment of technologies that could make decisions that unfairly impact specific groups), privacy considerations, and security considerations.

- The conference expects that many papers will be foundational research and not tied to particular applications, let alone deployments. However, if there is a direct path to any negative applications, the authors should point it out. For example, it is legitimate to point out that an improvement in the quality of generative models could be used to generate deepfakes for disinformation. On the other hand, it is not needed to point out that a generic algorithm for optimizing neural networks could enable people to train models that generate Deepfakes faster.
- The authors should consider possible harms that could arise when the technology is being used as intended and functioning correctly, harms that could arise when the technology is being used as intended but gives incorrect results, and harms following from (intentional or unintentional) misuse of the technology.
- If there are negative societal impacts, the authors could also discuss possible mitigation strategies (e.g., gated release of models, providing defenses in addition to attacks, mechanisms for monitoring misuse, mechanisms to monitor how a system learns from feedback over time, improving the efficiency and accessibility of ML).

## 11. Safeguards

Question: Does the paper describe safeguards that have been put in place for responsible release of data or models that have a high risk for misuse (e.g., pretrained language models, image generators, or scraped datasets)?

Answer: [NA]

Justification: The paper poses no such risks.

Guidelines:

- The answer NA means that the paper poses no such risks.
- Released models that have a high risk for misuse or dual-use should be released with necessary safeguards to allow for controlled use of the model, for example by requiring that users adhere to usage guidelines or restrictions to access the model or implementing safety filters.
- Datasets that have been scraped from the Internet could pose safety risks. The authors should describe how they avoided releasing unsafe images.
- We recognize that providing effective safeguards is challenging, and many papers do not require this, but we encourage authors to take this into account and make a best faith effort.

## 12. Licenses for existing assets

Question: Are the creators or original owners of assets (e.g., code, data, models), used in the paper, properly credited and are the license and terms of use explicitly mentioned and properly respected?

Answer: [NA]

Justification: The paper does not use existing assets.

Guidelines:

- The answer NA means that the paper does not use existing assets.
- The authors should cite the original paper that produced the code package or dataset.
- The authors should state which version of the asset is used and, if possible, include a URL.
- The name of the license (e.g., CC-BY 4.0) should be included for each asset.
- For scraped data from a particular source (e.g., website), the copyright and terms of service of that source should be provided.
- If assets are released, the license, copyright information, and terms of use in the package should be provided. For popular datasets, [paperswithcode.com/datasets](https://paperswithcode.com/datasets) has curated licenses for some datasets. Their licensing guide can help determine the license of a dataset.
- For existing datasets that are re-packaged, both the original license and the license of the derived asset (if it has changed) should be provided.

- If this information is not available online, the authors are encouraged to reach out to the asset’s creators.

### 13. New assets

Question: Are new assets introduced in the paper well documented and is the documentation provided alongside the assets?

Answer: [NA]

Justification: The paper does not release new assets.

Guidelines:

- The answer NA means that the paper does not release new assets.
- Researchers should communicate the details of the dataset/code/model as part of their submissions via structured templates. This includes details about training, license, limitations, etc.
- The paper should discuss whether and how consent was obtained from people whose asset is used.
- At submission time, remember to anonymize your assets (if applicable). You can either create an anonymized URL or include an anonymized zip file.

### 14. Crowdsourcing and research with human subjects

Question: For crowdsourcing experiments and research with human subjects, does the paper include the full text of instructions given to participants and screenshots, if applicable, as well as details about compensation (if any)?

Answer: [NA]

Justification: The paper does not involve crowdsourcing nor research with human subjects.

Guidelines:

- The answer NA means that the paper does not involve crowdsourcing nor research with human subjects.
- Including this information in the supplemental material is fine, but if the main contribution of the paper involves human subjects, then as much detail as possible should be included in the main paper.
- According to the NeurIPS Code of Ethics, workers involved in data collection, curation, or other labor should be paid at least the minimum wage in the country of the data collector.

### 15. Institutional review board (IRB) approvals or equivalent for research with human subjects

Question: Does the paper describe potential risks incurred by study participants, whether such risks were disclosed to the subjects, and whether Institutional Review Board (IRB) approvals (or an equivalent approval/review based on the requirements of your country or institution) were obtained?

Answer: [NA]

Justification: The paper does not involve crowdsourcing nor research with human subjects.

Guidelines:

- The answer NA means that the paper does not involve crowdsourcing nor research with human subjects.
- Depending on the country in which research is conducted, IRB approval (or equivalent) may be required for any human subjects research. If you obtained IRB approval, you should clearly state this in the paper.
- We recognize that the procedures for this may vary significantly between institutions and locations, and we expect authors to adhere to the NeurIPS Code of Ethics and the guidelines for their institution.
- For initial submissions, do not include any information that would break anonymity (if applicable), such as the institution conducting the review.

### 16. Declaration of LLM usage



1331 Question: Does the paper describe the usage of LLMs if it is an important, original, or  
1332 non-standard component of the core methods in this research? Note that if the LLM is used  
1333 only for writing, editing, or formatting purposes and does not impact the core methodology,  
1334 scientific rigorousness, or originality of the research, declaration is not required.

1335 Answer: [NA]

1336 Justification: The core method development in this research does not involve LLMS as any  
1337 important, original, or non-standard components.

1338 Guidelines:

- 1339 • The answer NA means that the core method development in this research does not  
1340 involve LLMs as any important, original, or non-standard components.
- 1341 • Please refer to our LLM policy (<https://neurips.cc/Conferences/2025/LLM>)  
1342 for what should or should not be described.
